# Growth Rules for the Repair of Asynchronous Irregular Neuronal Networks after Peripheral Lesions

Ankur Sinha<sup>1\*</sup>, Christoph Metzner<sup>1,2</sup>, Neil Davey<sup>1</sup>, Roderick Adams<sup>1</sup>, Michael Schmucker<sup>1</sup>, and Volker Steuber<sup>1</sup>

<sup>1</sup>UH Biocomputation, Centre for Computer Science and Informatics Research, University of Hertfordshire, Hatfield UK

<sup>2</sup>Department of Software Engineering and Theoretical Computer Science, Technische Universität Berlin, Berlin, Germany.

October 18, 2019

## Abstract

Several homeostatic mechanisms enable the brain to maintain desired levels of neuronal activity. One of these, homeostatic structural plasticity, has been reported to restore activity in networks disrupted by peripheral lesions by altering their neuronal connectivity. While multiple lesion experiments have studied the changes in neurite morphology that underlie modifications of synapses in these networks, the underlying mechanisms that drive these changes are yet to be explained. Evidence suggests that neuronal activity modulates neurite morphology and may stimulate neurites to selectively sprout or retract to restore network activity levels. We developed a new spiking network model, simulations of which accurately reproduce network rewiring after peripheral lesions as reported in experiments, to study these activity dependent growth regimes of neurites. To ensure that our simulations closely resemble the behaviour of networks in the brain, we deafferent a biologically realistic network model that exhibits low frequency Asynchronous Irregular (AI) activity as observed in cerebral cortex.

Our simulation results indicate that the re-establishment of activity in neurons both within and outside the deprived region, the Lesion Projection Zone (LPZ), requires opposite activity dependent growth rules for excitatory and inhibitory post-synaptic elements. Analysis of these growth regimes indicates that they also contribute to the maintenance of activity levels in individual neurons. Furthermore, in our model, the directional formation of synapses that is observed in experiments requires that pre-synaptic excitatory and inhibitory elements also follow opposite growth rules. Lastly, we observe that our proposed model of homeostatic structural plasticity and the inhibitory synaptic plasticity mechanism that also balances our AI network are both necessary for successful rewiring of the network.

## Contents

|          |                                                                                               |           |
|----------|-----------------------------------------------------------------------------------------------|-----------|
| <b>1</b> | <b>Introduction</b>                                                                           | <b>2</b>  |
| <b>2</b> | <b>Results</b>                                                                                | <b>2</b>  |
| 2.1      | A new model of recovery in simplified cortical AI networks after peripheral lesions . . . . . | 2         |
| 2.2      | Activity-dependent dynamics of post-synaptic structures . . . . .                             | 6         |
| 2.3      | Activity dependent dynamics of pre-synaptic structures . . . . .                              | 7         |
| 2.4      | Post-synaptic growth rules stabilise individual neurons . . . . .                             | 10        |
| 2.5      | Synaptic and structural plasticity are both necessary for repair . . . . .                    | 11        |
| <b>3</b> | <b>Discussion</b>                                                                             | <b>13</b> |
| <b>4</b> | <b>Methods</b>                                                                                | <b>14</b> |
| 4.1      | Neuron model . . . . .                                                                        | 15        |
| 4.2      | Network simulations . . . . .                                                                 | 17        |
| 4.2.1    | Initial network structure . . . . .                                                           | 17        |
| 4.2.2    | Initial stabilisation to physiological state . . . . .                                        | 18        |
| 4.2.3    | Simulation of peripheral lesion . . . . .                                                     | 18        |
| 4.2.4    | Network reorganisation . . . . .                                                              | 18        |
| 4.3      | Single cell simulations . . . . .                                                             | 20        |

## 49 1 Introduction

50 Multiple plasticity mechanisms act simultaneously and at differing time scales on neuronal net-  
51 works in the brain. Whilst synaptic plasticity is limited to the changes in efficacy of pre-existing  
52 synapses, *structural* plasticity includes the formation and removal of whole neurites and synapses.  
53 Thus, structural plasticity can cause major changes in network function through alterations in con-  
54 nectivity. Along with confirmation of structural plasticity in the adult brain [Kno+02; Lee+05;  
55 MNS06; May11], recent work has also shown that axonal boutons and branches [De +06; Ste+06;  
56 GGC07; Mar+10; Che+11; Mar+14], and both inhibitory [Che+12; Vil+16] and excitatory dendritic  
57 structures [Tra+02; Hol+05] are highly dynamic even in physiological networks.

58 Stability in spite of such continuous plasticity requires homeostatic forms of structural plastic-  
59 ity. A multitude of lesion experiments provide evidence for homeostatic structural plasticity [Ras82;  
60 WC84; All+91; HS91; Pon+91; Raj+93; DG94; DG95; Ros+95; Sal+95; FTK98; SK15]. A common  
61 feature observed in these studies is the substantial network reorganisation that follows deafferenta-  
62 tion. Recent time-lapse imaging studies of neurites in the cortex during the rewiring process show  
63 that both axonal [Yam+09; Mar+10; Che+11] and dendritic structures display increased turnover  
64 rates [Tra+02; HS05; Kec+08; Che+11] in and around the area deafferented by the peripheral le-  
65 sion, the LPZ. Specifically, while excitatory neurons outside the LPZ sprout new axonal collater-  
66 als into the LPZ, inhibitory neurons inside the LPZ extend new axons outwards [Mar+10]. Along  
67 with an increased excitatory dendritic spine gain [Kec+08] and a marked loss of inhibitory shaft  
68 synapses [Kec+11; Che+12] in the LPZ, the rewiring of synapses in the network successfully restores  
69 activity to deprived LPZ neurons in many cases.

70 Access to such data and recent advances in simulation technology have enabled computational  
71 modelling of activity dependent structural plasticity [BVW09; Deg+12; BO13; BO14; BSO14a; BSO14b;  
72 OB17]. In their seminal work, Butz and van Ooyen introduced the Model of Structural Plastic-  
73 ity (MSP) framework [BVW09]. They demonstrated its utility by simulating a peripheral lesioning  
74 study to explore the activity dependent growth rules of neurites [BO13; BO14]. Their analysis sug-  
75 gests that the restoration of activity could only be caused by the experimentally noted increase in  
76 excitatory lateral projections into the LPZ if dendritic elements sprouted at a lower level of activity  
77 than their axonal counterparts. The MSP framework has since been partially implemented in the  
78 NEST simulator [Dia+16] and is an important tool for the computational modelling of structural  
79 plasticity [GR18; LGR18].

80 While investigating the capacity of simplified cortical balanced AI spiking neural networks [Vog+11]  
81 to store and recall associative memories [Sin+15], we wondered how deafferentation and subsequent  
82 connectivity updates that accompany the network repair process would affect its performance. Since  
83 the peripheral lesion model proposed by Butz and van Ooyen [BO13] was not based on a balanced  
84 cortical network model with biologically realistic AI activity, their hypothesised growth rules did  
85 not elicit repair in our simulations. Additionally, while providing salient testable predictions, the  
86 original MSP growth rules have specifically been developed for excitatory neurites only—they do  
87 not provide activity dependent growth rules for inhibitory neurites, nor do they reproduce the ex-  
88 perimentally observed outgrowth of inhibitory axons from the LPZ. A complete, general computa-  
89 tional model of peripheral lesioning in cortical networks is therefore still lacking.

90 Here, we present a novel computational model of peripheral lesioning and recovery in a sim-  
91 plified cortical spiking neural network with biologically realistic characteristics. In its physiological  
92 state, our network model is balanced by inhibitory Spike Timing Dependent Plasticity (STDP) so  
93 that it exhibits a low frequency AI spiking state similar to the mammalian cortex [Vog+11]. By  
94 deafferenting this network and reproducing a course of repair as reported in experimental work, we  
95 derive new independent activity dependent growth rules for all neurites—excitatory and inhibitory,  
96 pre-synaptic and post-synaptic. These growth rules result in the ingrowth of excitatory projections  
97 into and the outgrowth of inhibitory projections from the deafferented area that is observed in exper-  
98 iments. Although deduced from network simulations, we find that our growth rules also contribute  
99 to the stability of individual neurons by re-establishing their balance between excitation and inhibi-  
100 tion (E-I balance). Furthermore, we show that both homeostatic processes in our model—synaptic  
101 plasticity and structural plasticity—are necessary for repair. Our model provides a new platform to  
102 study the structural and functional consequences of peripheral lesions in cortical networks.

## 103 2 Results

### 104 2.1 A new model of recovery in simplified cortical AI networks after peripheral 105 lesions

106 Our network model consists of excitatory (E) and inhibitory (I) conductance based point neuron  
107 populations [MBC04] distributed in a continuous two-dimensional toroidal grid. Neurons in the

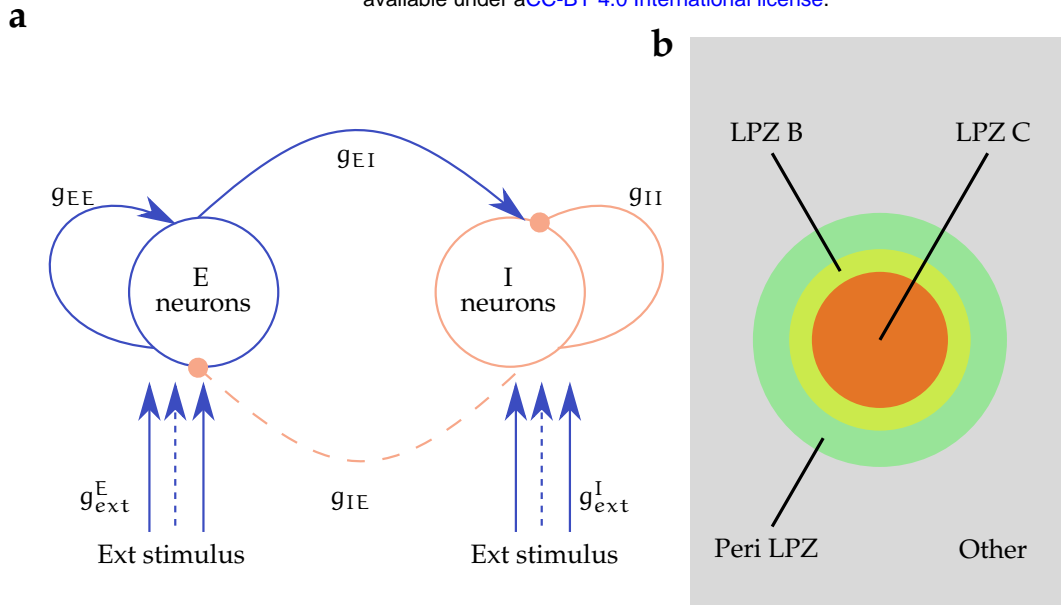

**Figure 1. Overview of the model:** (a) Excitatory (E) and Inhibitory (I) neurons ( $N_E = 4N_I$  (see Table 3)) are initially connected via synapses with a connection probability of ( $p = 0.02$ ). All synapses (EE, EI, II), other than IE synapses, which are modulated by inhibitory spike-timing dependent plasticity, are static with conductances  $g_{EE}$ ,  $g_{EI}$ ,  $g_{II}$ , respectively. All synapse sets are modifiable by the structural plasticity mechanism. External Poisson spike stimuli are provided to all excitatory and inhibitory neurons via static synapses with conductances  $g_{ext}^E$  and  $g_{inh}^I$ , respectively. To simulate deafferentation, the subset of these synapses that project onto neurons in the Lesion Projection Zone (LPZ) (represented by dashed lines in the figure) are disconnected. (b) Spatial classification of neurons in relation to the LPZ: LPZ C (centre of LPZ) consists of 2.5% of the neuronal population; LPZ B (inner border of LPZ) consists of 2.5% of the neuronal population; Peri-LPZ (outer border of LPZ) consists of 5% of the neuronal population; Other neurons consist of the remaining 90% of the neuronal population. (Figure not to scale)

108 network are connected via synapses to simulate a simplified cortical AI network balanced by in-  
 109 hibitory STDP [Vog+11] (Figure 1a). Apart from inhibitory synapses projecting from the inhibitory  
 110 neurons to the excitatory ones (IE synapses), whose weights are modified by Vogels-Sprekeler sym-  
 111 metric inhibitory STDP, all synaptic conductances (II, EI, EE) are static. Structural plasticity, how-  
 112 ever, acts on all synapses in the network. We simulate a peripheral lesion in the balanced network  
 113 by deafferenting a spatial selection of neurons to form the LPZ. For easier analysis, and as often  
 114 done in experimental lesion studies, we divide the neuronal population into four regions relative to  
 115 the LPZ (Figure 1b).

As in Butz and van Ooyen's MSP framework, each neuron possesses sets of both pre-synaptic (axonal) and post-synaptic (dendritic) synaptic elements, the total numbers of which are represented by ( $z_{pre}$ ) and ( $z_{post}$ ), respectively. Excitatory and inhibitory neurons only possess excitatory ( $z_{pre}^E$ ) and inhibitory axonal elements ( $z_{pre}^I$ ), respectively, but they can each host both excitatory and inhibitory dendritic elements ( $z_{post}^E, z_{post}^I$ ) (Figure 2a). The rate of change of each type of synaptic element, ( $dz/dt$ ), is modelled as a Gaussian function of the neuron's "calcium concentration" ( $[Ca^{2+}]$ ):

$$\begin{aligned} \frac{dz}{dt} &= \nu \left( 2 \exp \left( -\left( \frac{[Ca^{2+}] - \xi}{\zeta} \right)^2 \right) - \omega \right) \\ \xi &= \frac{\eta + \epsilon}{2}, \\ \zeta &= \frac{\eta - \epsilon}{2\sqrt{-\ln(\omega/2)}} \end{aligned} \quad (1)$$

Here,  $\nu$  is a scaling factor and  $\eta, \epsilon$  define the width and location of the Gaussian curve on the x-axis. Extending the original MSP framework, we add a new parameter  $\omega$  that controls the location of the curve on the y-axis. The relationship between  $\eta, \epsilon$  and the optimal activity level of a neuron,  $\psi$ , govern the activity-dependent dynamics of each type of synaptic element. A neuron should not turn over neurites when its activity is optimal ( $[Ca^{2+}] = \psi$ ). This implies that the growth curves must be placed such that  $dz/dt = 0$  when  $[Ca^{2+}] = \psi$ . Hence,  $\psi$  can take one of two values: ( $\psi = \eta$ )

**a**

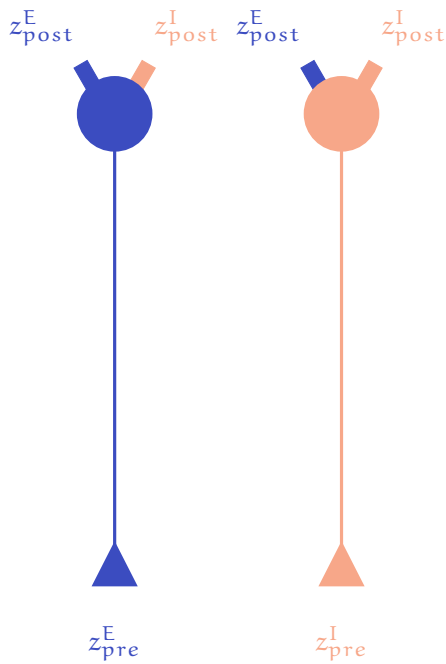

**b**

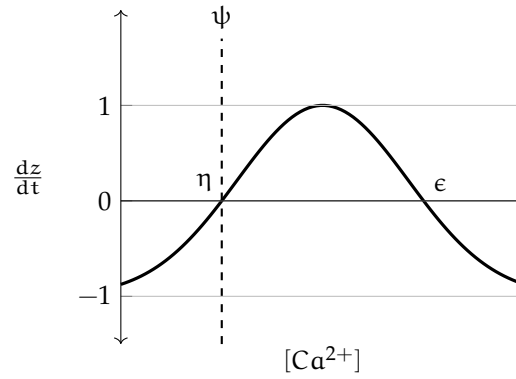

**c**

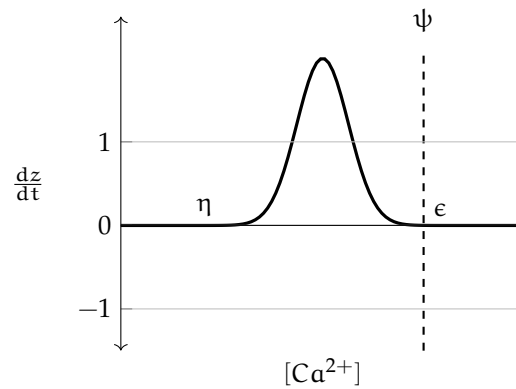

**Figure 2. Gaussian growth curves modulate the rate of turnover of synaptic elements ( $\frac{dz}{dt}$ ) in a neuron as a function of its  $[Ca^{2+}]$ :** (a) Excitatory: Blue; Inhibitory: Red; All neurons possess excitatory and inhibitory post-synaptic elements ( $z_{post}^E, z_{post}^I$ ) but excitatory and inhibitory neurons can only bear excitatory and inhibitory pre-synaptic elements, respectively ( $z_{pre}^E, z_{pre}^I$ ); (b) and (c): Example Gaussian growth curves. Constants  $\eta$  and  $\epsilon$  control the width and positioning of the growth curve on the x-axis.  $\omega$  (see Equation 1) controls the positioning of the growth curve on the y-axis.  $\nu$  (see Equation 1) is a scaling factor.  $\psi$  is the optimal  $[Ca^{2+}]$  for the neuron. The minimum and maximum values of  $dz/dt$  can be analytically deduced to be  $-\nu\omega$  and  $\nu(2-\omega)$  respectively (See Methods). The relationship between  $\eta$ ,  $\epsilon$ , and  $\psi$  regulates the activity dependent dynamics of neurites.

(b)  $\psi = \eta = 5.0, \epsilon = 15.0, \nu = 1.0, \omega = 1.0, -\nu\omega = -1.0, \nu(2-\omega) = 1.0$ . Here, new neurites are formed when the neuronal activity exceeds the required level and removed when it falls below it. (c)

$\eta = 5.0, \psi = \epsilon = 15.0, \nu = 1.0, \omega = 0.001, -\nu\omega = -0.001, \nu(2-\omega) = 1.999$ . Here, the growth curve is shifted up along the y-axis by decreasing the value of  $\omega$ . New neurites are formed when the neuronal activity is less than the homeostatic level and removed (at a very low rate) when it exceeds it.

or ( $\psi = \epsilon$ ), and the turnover of synaptic elements  $dz/dt$  is:

$$\begin{aligned} &> 0 && \text{for } \eta < [Ca^{2+}] < \epsilon \\ &= 0 && \text{for } [Ca^{2+}] = \{\eta, \epsilon\} \\ &< 0 && \text{for } [Ca^{2+}] < \eta \cup [Ca^{2+}] > \epsilon \end{aligned} \quad (2)$$

116 This is illustrated in Figure 2. Other than in a window between  $\eta$  and  $\epsilon$  where new neurites sprout,  
 117 they retract. The new parameter,  $\omega$ , permits us to adjust the speed of sprouting and retraction  
 118 (Figures 2b and 2c). In Figure 2b with ( $\psi = \eta$ ), new neurites will only be formed when the neuron  
 119 experiences activity that is greater than its homeostatic value ( $\psi < [Ca^{2+}] < \epsilon$ ). Figure 2c, on the  
 120 other hand, shows the case for ( $\psi = \epsilon$ ), where growth occurs when neuronal activity is less than  
 121 optimal ( $\eta < [Ca^{2+}] < \psi$ ).

122 The  $[Ca^{2+}]$  for each neuron represents a time averaged measure of its electrical activity:

$$\frac{d[Ca^{2+}]}{dt} = \begin{cases} -\frac{[Ca^{2+}]}{\tau_{[Ca^{2+}]}} + \beta, & \text{if } V \geq V_{th} \\ -\frac{[Ca^{2+}]}{\tau_{[Ca^{2+}]}}', & \text{otherwise.} \end{cases} \quad (3)$$

123 Here,  $\tau_{[Ca^{2+}]}$  is the time constant with which  $[Ca^{2+}]$  decays in the absence of a spike,  $\beta$  is the  
 124 constant increase in  $[Ca^{2+}]$  caused by each spike,  $V$  is the membrane potential of the neuron, and  
 125  $V_{th}$  is the threshold membrane potential.

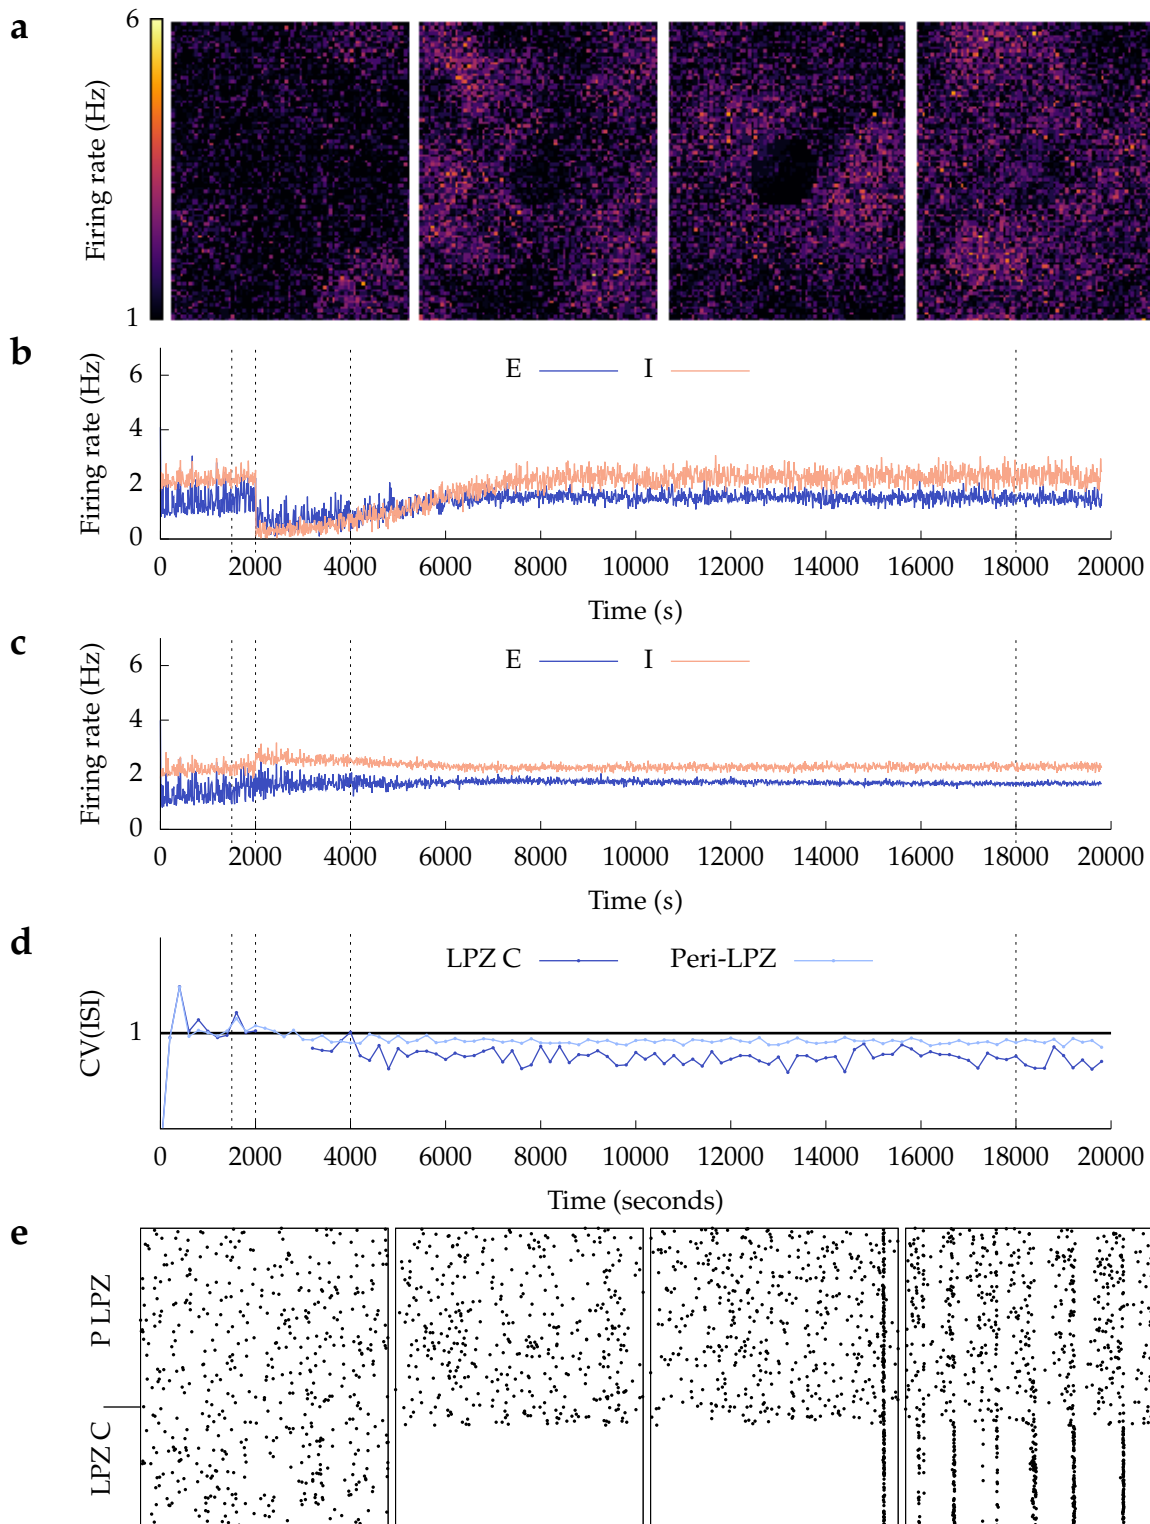

**Figure 3. Recovery of activity over time:** (Mean firing rates of neurons are calculated over a 2500 ms window): (a) shows the firing rates of the whole excitatory population at  $t = \{1500 \text{ s}, 2001.5 \text{ s}, 4000 \text{ s}, \text{ and } 18000 \text{ s}\}$ . These are marked by dashed lines in the next graphs. (b) shows mean firing rate of neurons in LPZ-C; (c) shows mean firing rate of neurons in peri-LPZ; (d) shows the coefficient of variation (CV) of the inter-spike intervals of neurons in the LPZ-C and peri-LPZ. The graph is discontinuous because ISI CV is undefined in the absence of spikes in the LPZ-C and peri-LPZ. (e) shows spike times of neurons in the LPZ C and peri-LPZ over a 1 s period at  $t = \{1500 \text{ s}, 2001.5 \text{ s}, 4000 \text{ s}, \text{ and } 18000 \text{ s}\}$ . The network is permitted to achieve its balanced Asynchronous Irregular (AI) low frequency firing regime under the action of inhibitory synaptic plasticity ( $t \leq 1500 \text{ s}$ ). Our structural plasticity mechanism is then activated to confirm that the network remains in its balanced AI state (panel 1 in Figure 3a). At ( $t = 2000 \text{ s}$ ), neurons in the LPZ are deafferented (panel 2 in Figures 3a and 3e are at  $t = 2001.5 \text{ s}$ ) and the network allowed to repair itself under the action of our structural plasticity mechanism (panels 3 ( $t = 4000 \text{ s}$ ) and 4 ( $t = 18000 \text{ s}$ ) in Figures 3a and 3e).

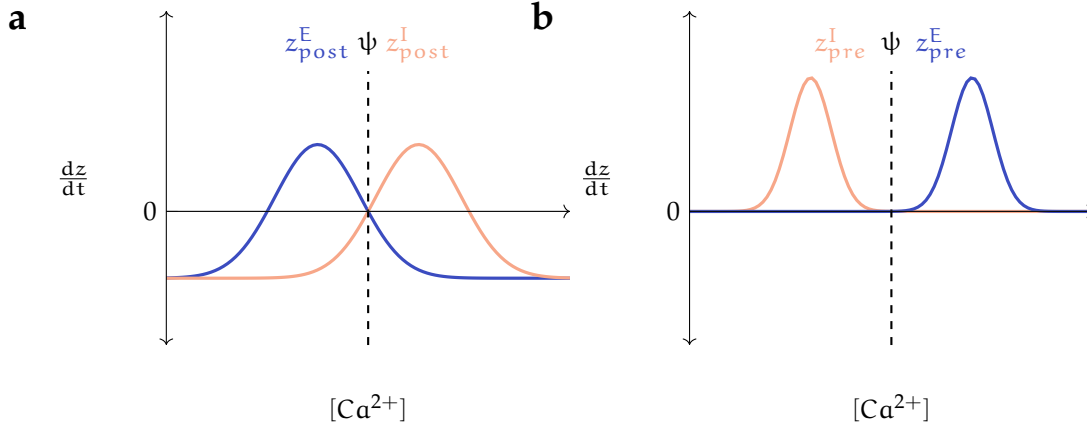

**Figure 4. Activity-dependent dynamics of synaptic elements ( $dz/dt$ ) as functions of a neuron's time averaged activity ( $[Ca^{2+}]$ ): (a) post-synaptic elements:** The balance between excitation and inhibition (E-I balance) received by a neuron may be disturbed by a change in either of the two types of input. Post-synaptic elements of a neuron react to deviations in activity from the optimal level ( $\psi$ ) by countering the changes in excitatory or inhibitory inputs to restore the E-I balance. For both excitatory and inhibitory neurons, excitatory post-synaptic elements sprout when the neuron experiences a reduction in its activity, and retract when the neuron has received extra activity. Inhibitory post-synaptic elements for all neurons follow the opposite rule: they sprout when the neuron has extra activity and retract when the neuron is deprived of activity. **(b) pre-synaptic elements.** In excitatory neurons, axonal sprouting is stimulated by extra activity. In inhibitory neurons, on the other hand, deprivation in activity stimulates axonal sprouting. Synaptic elements that do not find corresponding partners to form synapses (free synaptic elements) decay exponentially with time. These graphs are for illustration only. Please refer to Table 2 for parameter values.

126 Figure 3 provides an overview of the activity in the network observed in our simulations. The  
 127 network is initially balanced by the homeostatic inhibitory STDP mechanism, which results in es-  
 128 tablishing its physiological state where it displays low frequency AI firing similar to cortical neu-  
 129 rons [Vog+11] ( $t < 1500$  s in Figures 3b, 3c and 3d, and panel 1 in Figures 3a and 3e). Once this  
 130 AI state is achieved, homeostatic structural plasticity is enabled, and it is confirmed that the net-  
 131 work maintains its balanced state under the combined action of the two homeostatic mechanisms  
 132 ( $1500$  s  $< t < 2000$  s in Figures 3b, 3c and 3d). At ( $t = 2000$  s), the network is deafferented by  
 133 removing external inputs to neurons in the LPZ.

134 In line with experimental findings, the immediate result of deafferentation is the loss of activity  
 135 in neurons of the LPZ. For neurons outside the LPZ, on the other hand, our simulations show an  
 136 increase in activity suggesting that the net effect of LPZ deafferentation on these neurons is a loss of  
 137 inhibition rather than excitation ( $t = 2000$  s in Figure 3c). To our knowledge, this phenomenon has  
 138 not yet been investigated in experiments, and an increase in neuronal activity following deafferenta-  
 139 tion of a neighbouring area is therefore the first testable prediction provided by our model. The  
 140 change in activity caused by deafferentation stimulates neurite turnover in neurons of the network  
 141 in accordance with our proposed activity dependent growth rules ( $t > 2000$  s). Over time, activity  
 142 is gradually restored in the network to pre-deafferentation levels ( $t = 18000$  s in Figures 3b, 3c, and  
 143 panel 4 in Figures 3a and 3e). In the following sections, we demonstrate that the alterations in net-  
 144 work connectivity during repair follow the same regime as reported in experiments, and we derive  
 145 our growth rules.

146 Even though the mean activity of neurons within and outside the LPZ returns to pre-deprivation  
 147 levels, the network reorganization by structural plasticity leads to synchronous spiking in neurons  
 148 in the LPZ, instead of the AI firing during the pre-deprivation stages in our simulations ( $t > 4000$  s  
 149 in Figure 3d, and panels 3 and 4 in Figure 3e). This predicted effect of network rewiring on the  
 150 temporal characteristics of neural activity should be an interesting subject for future experimental  
 151 studies. Furthermore, the observed lack of AI activity in the LPZ is expected to have functional  
 152 implications; this is another promising topic for future theoretical work.

## 153 2.2 Activity-dependent dynamics of post-synaptic structures

All neurons in the LPZ, excitatory and inhibitory, show near zero activity after deafferentation due to a net loss in excitatory input (panel 2 in Figures 3a, 3e, and  $t = 2000$  s in Figure 3b). Experimental studies report that these neurons gain excitatory synapses on newly formed dendritic spines [Kec+08] and lose inhibitory shaft synapses [Che+12] to restore activity after deprivation. The increase in lateral excitatory projections to these neurons requires them to gain excitatory dendritic (postsynaptic) elements to serve as contact points for excitatory axonal collaterals. At the same time, inhibitory synapses can be lost by the retraction of inhibitory dendritic elements. This suggests that new excitatory post-synaptic elements should be formed and inhibitory ones removed

when neuronal activity is less than its optimal level ( $[Ca^{2+}] < \psi$ ) in Figure 4a):

$$\begin{aligned} \frac{dz_{post}^E}{dt} &> 0 \quad \text{for } [Ca^{2+}] < \psi \\ \frac{dz_{post}^I}{dt} &< 0 \quad \text{for } [Ca^{2+}] < \psi \end{aligned} \quad (4)$$

While we were unable to find experimental evidence on the activity of excitatory or inhibitory neurons just outside the LPZ, in our simulations, these neurons exhibit increased activity after deafferentation ( $t = 2000$  s in Figure 3c). Unlike neurons in the LPZ that suffer a net loss of excitation, these neurons appear to suffer a net loss of inhibition, which indicates that they must gain inhibitory and lose excitatory inputs to return to their balanced state. Hence, the formation of new inhibitory dendritic elements and the removal of their excitatory counterparts occurs in a regime where neuronal activity exceeds the required amount ( $[Ca^{2+}] > \psi$ ) in Figure 4a):

$$\begin{aligned} \frac{dz_{post}^E}{dt} &< 0 \quad \text{for } [Ca^{2+}] > \psi \\ \frac{dz_{post}^I}{dt} &> 0 \quad \text{for } [Ca^{2+}] > \psi \end{aligned} \quad (5)$$

154 The constraints described by equations 2, 4, and 5 can be satisfied by Gaussian growth rules for ex-  
 155 citatory and inhibitory dendritic elements, with  $\epsilon_{post}^E = \psi$  and  $\eta_{post}^I = \psi$ , respectively (Figure 4a).  
 156 Given the distinct characteristics of excitation and inhibition, the two growth rules were treated in-  
 157 dependently and the parameters governing them were tuned iteratively over multiple simulation  
 158 runs. For example, sufficiently high values for the rate of formation of inhibitory dendritic elements  
 159 had to be selected for excitatory neurons to prevent the build up of excessive excitation (Table 2).

160 Figure 5 shows the time course of rewiring of excitatory and inhibitory connections to excita-  
 161 tory neurons in the centre of the LPZ that results from the growth curves in our simulations. As  
 162 described in experimental studies, the loss of activity by neurons in the LPZ is followed by an in-  
 163 crease in excitatory input connections and a transient reduction in inhibitory input connections.  
 164 Specifically, as also found in these experiments, the increase in excitatory inputs is dominated by  
 165 an ingrowth of lateral projections from outside the LPZ. Both of these features can be seen in Fig-  
 166 ures 5a and 5b. As shown in Figure 6, neurons directly outside the LPZ lose excitatory and gain  
 167 inhibitory input connections to reduce their activity back to their optimal values. Furthermore, in  
 168 line with experimental observations, a significant contribution to the new inhibitory inputs to these  
 169 neurons is provided by new inhibitory projections from within the LPZ. Given the small number of  
 170 inhibitory neurons in the LPZ, however, their inhibitory projections are insufficient to stabilise the  
 171 large number of neurons outside the LPZ in our simulations. Hence, inhibitory projections are also  
 172 recruited from inhibitory neurons outside the LPZ.

### 173 2.3 Activity dependent dynamics of pre-synaptic structures

174 While the activity dependent formation and degradation of post-synaptic elements provides a home-  
 175 ostatic mechanism for the stabilisation of activity in single neurons and the network, the increase  
 176 in excitatory or inhibitory input received by a neuron also relies on the availability of pre-synaptic  
 177 counterparts. We derive activity dependent growth rules for excitatory ( $z_{pre}^E$ ) and inhibitory ( $z_{pre}^I$ )  
 178 pre-synaptic elements in a similar manner to that used for post-synaptic elements.

Within the LPZ, the increase in excitation requires a corresponding increase in the supply of ex-  
 citatory pre-synaptic elements. Experimental evidence reports a sizeable increase in the formation  
 and removal of axonal structures in and around the LPZ [Yam+09], with a marked addition of lateral  
 projections from neurons outside the LPZ into it [Mar+10]. While an increase in pre-synaptic ele-  
 ments within the LPZ may contribute to repair, an inflow of activity from the periphery of the LPZ  
 to its centre has been observed in experiments [DG94; Kec+08; Mar+10], pointing to the inwards  
 sprouting of excitatory axonal projections from outside the LPZ as the major driver of homeostatic  
 rewiring. For this sprouting of excitatory projections from the non-deafferentated area into the LPZ  
 to take place in our simulations, the increase in activity in neurons outside the LPZ must stimulate  
 the formation of their excitatory axonal elements:

$$\frac{dz_{pre}^E}{dt} > 0 \quad \text{for } [Ca^{2+}] > \psi \quad (6)$$

Conversely, neurons outside the LPZ with increased activity need access to inhibitory pre-synaptic  
 elements in order to receive the required additional inhibitory input. Deafferentation studies in  
 mouse somatosensory cortex [Mar+10] report more than a 2.5 fold increase in the lengths of in-  
 hibitory axons projecting out from inhibitory neurons in the LPZ two days after the peripheral le-  
 sion. This outgrowth of inhibitory projections preceded and was faster than the ingrowth of their

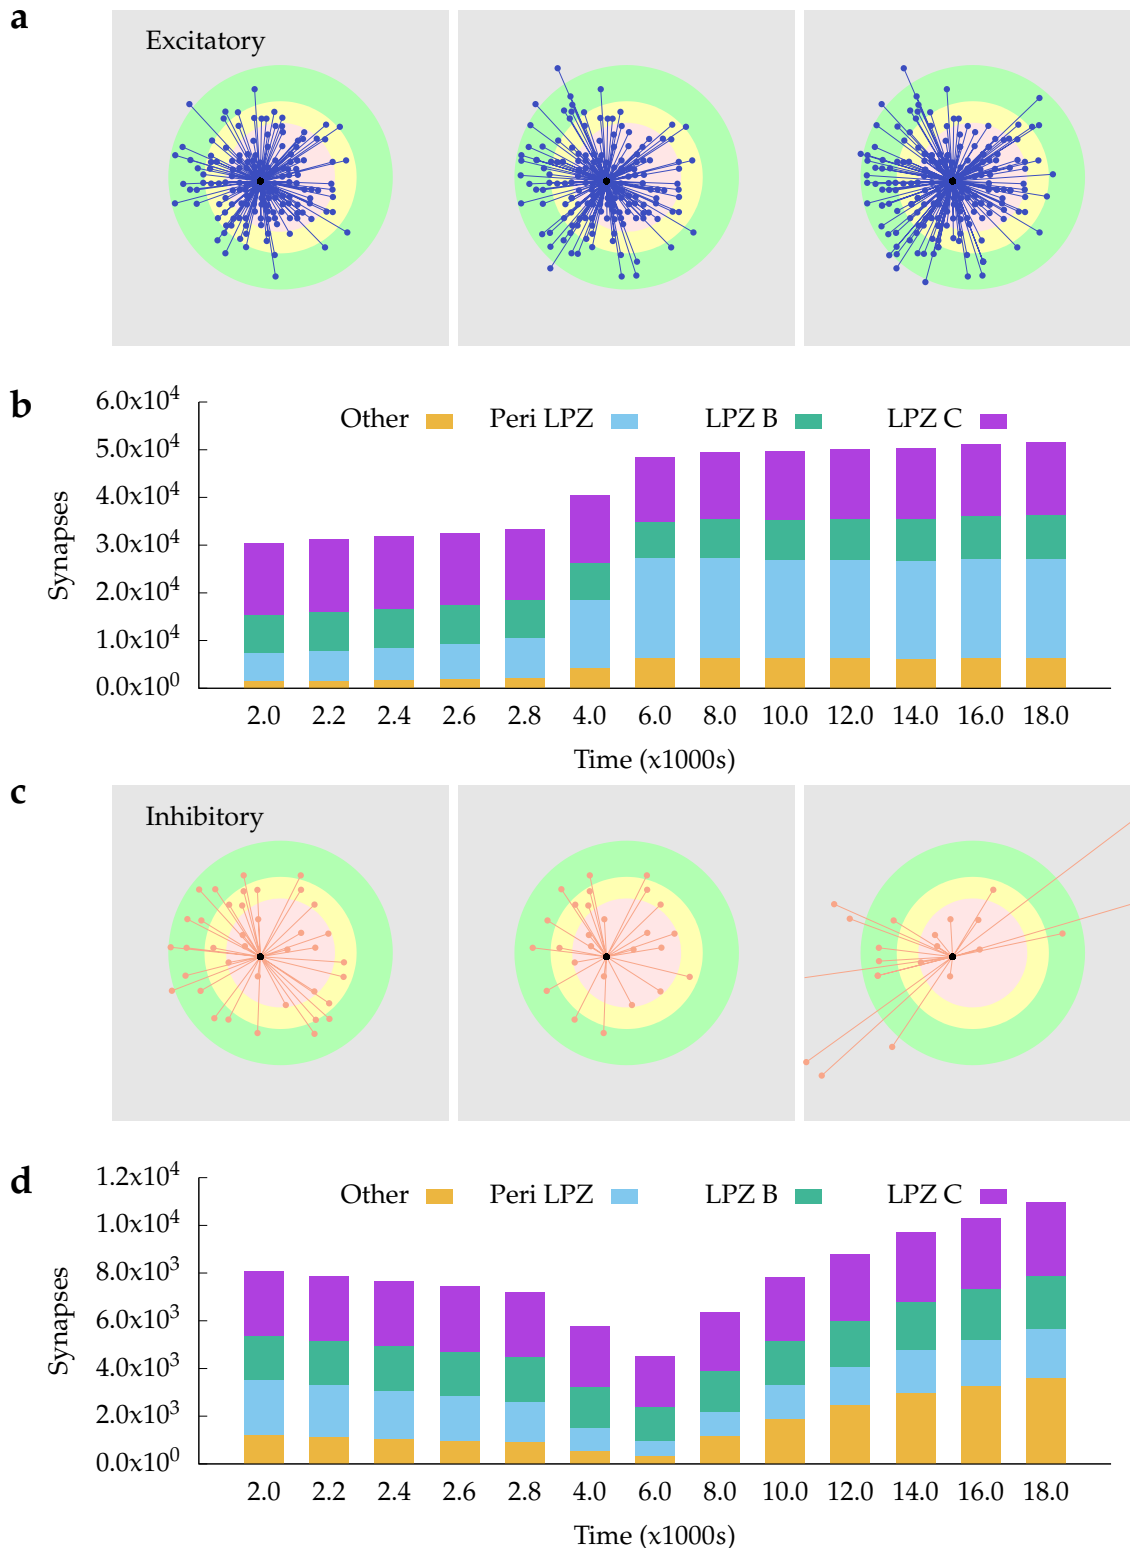

**Figure 5. Input connectivity of excitatory neurons in the centre of the LPZ:** (a) and (c) show incoming excitatory and inhibitory projections to the same randomly chosen neuron in the centre of the LPZ at different stages of our simulations. From left to right:  $t = 2000$  s,  $t = 4000$  s, and  $t = 18000$  s. (b) and (d) show total numbers of incoming excitatory and inhibitory projections to these neurons from different regions at different points in time. Following our proposed growth rules for post-synaptic elements and consistent with experimental reports, the deprived neurons in the LPZ C gain lateral excitatory inputs from neurons outside the LPZ. Also in line with biological observations, they temporarily experience disinhibition after deafferentation. However, as these neurons gain activity from their new lateral excitatory inputs, the number of their inhibitory input connections increases again in order to restore the E-I balance.



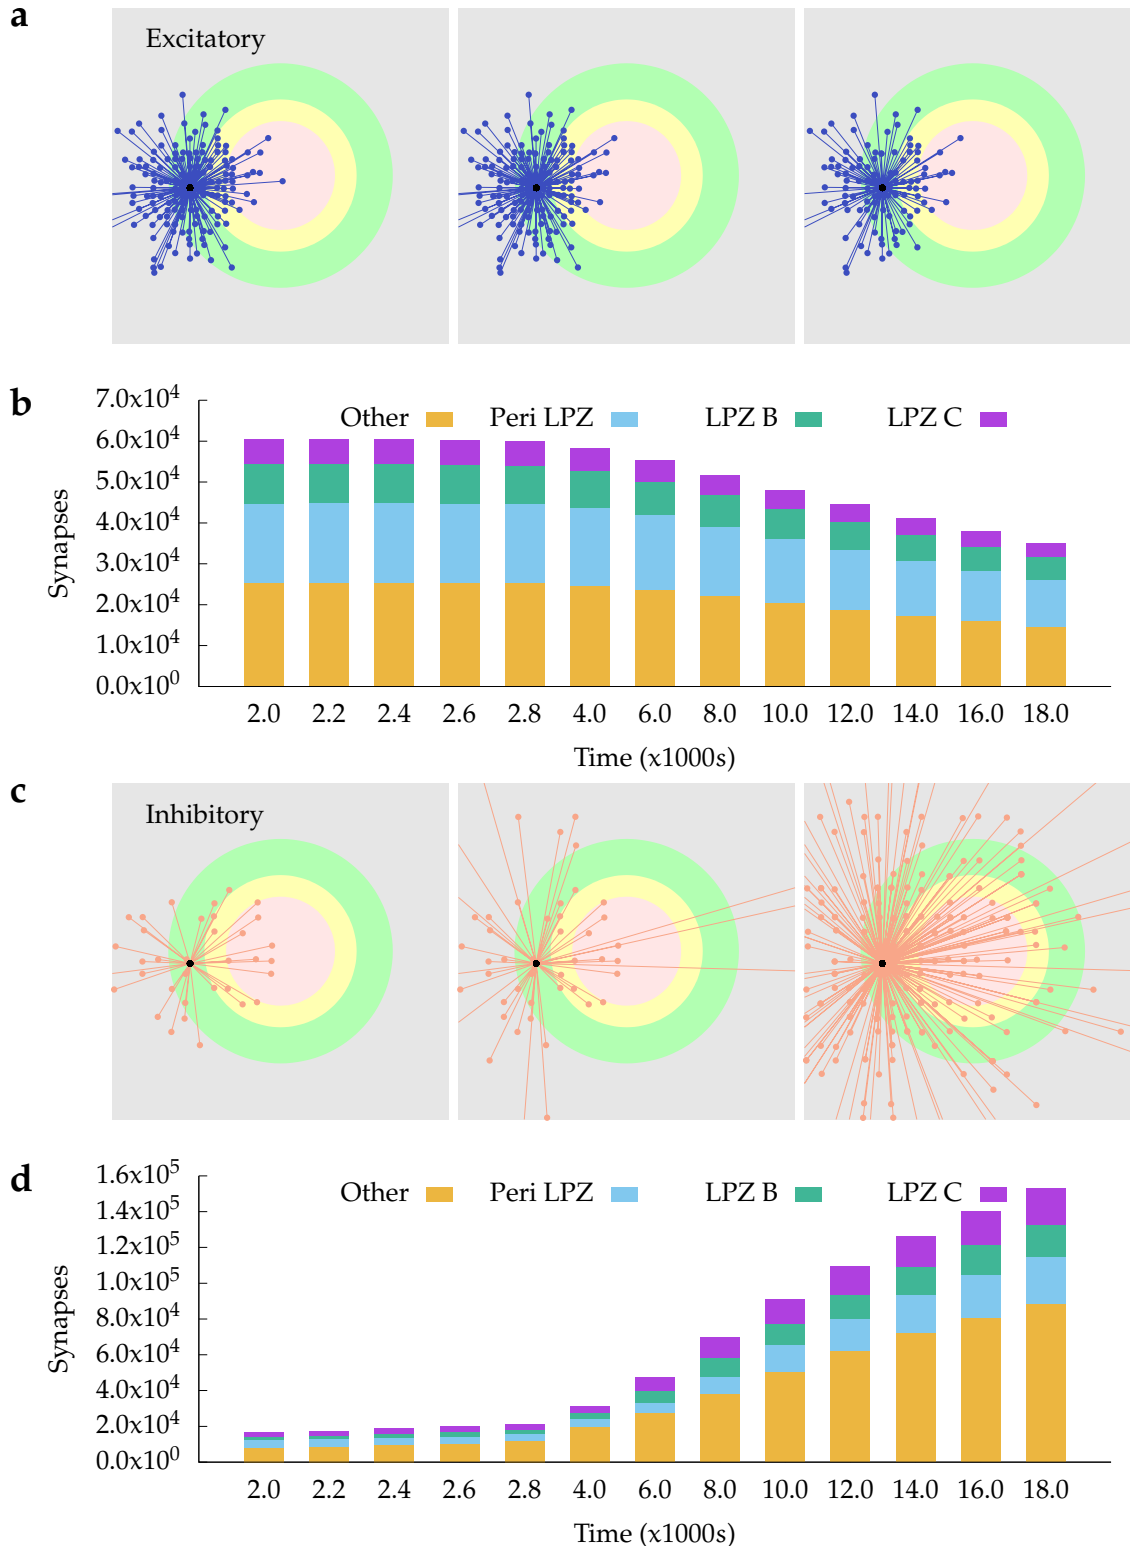

**Figure 6. Input connectivity of excitatory neurons in the peri-LPZ:** (a) and (c) show the incoming excitatory and inhibitory projections to the same randomly chosen neuron in the peri-LPZ at different stages in our simulation. From left to right:  $t = 2000$  s,  $t = 4000$  s, and  $t = 18000$  s. (b) and (d) show total numbers of incoming excitatory and inhibitory projections to these neurons from different regions at different points in time. In contrast to neurons in the LPZ, neurons outside the LPZ experience an increase in activity in our simulations. As a result of our growth rules, these neurons lose excitatory inputs and gain inhibitory ones so that their activity is reduced back to pre-lesion levels.

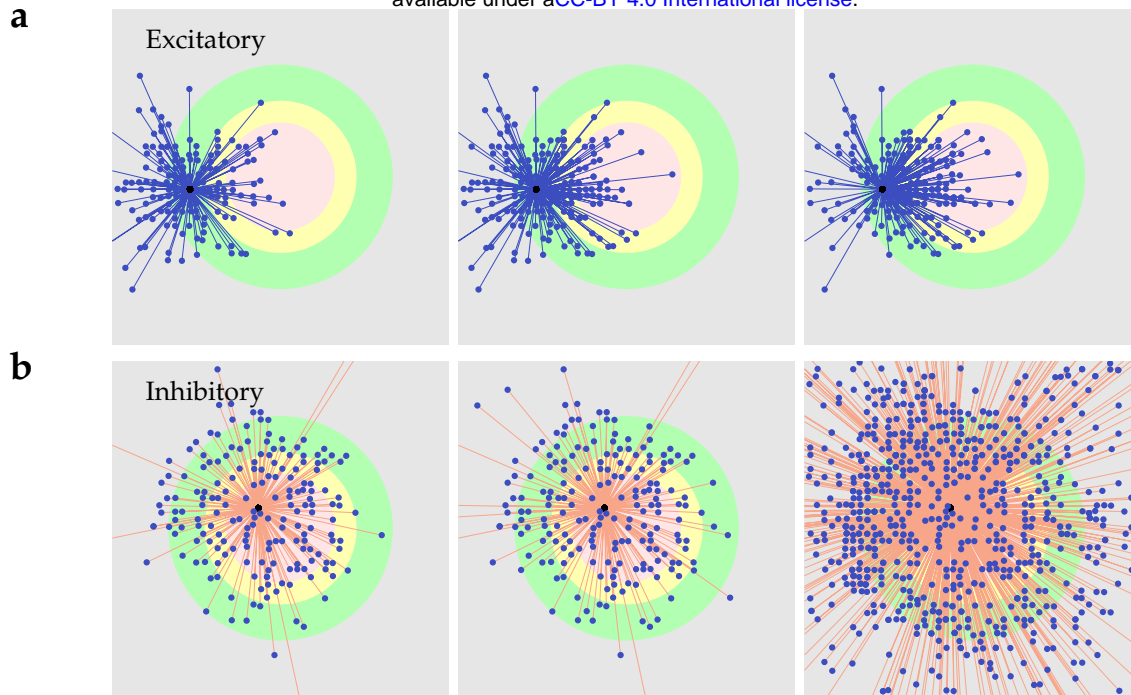

**Figure 7. Outgoing projections:** (a) shows the outgoing (axonal) projections of an excitatory neuron in the peri-LPZ. (b) shows the outgoing (axonal) projections of an inhibitory neuron in the LPZ C. From left to right:  $t = 2000$  s,  $t = 4000$  s, and  $t = 18000$  s. As per our suggested growth rules for pre-synaptic elements, excitatory neurons produce new pre-synaptic elements and sprout axonal projections when they experience extra activity, while inhibitory neurons form new pre-synaptic elements and grow axons when they are deprived of activity. As a consequence and in line with experimental data, following deafferentation of the LPZ, excitatory neurons in the peri-LPZ sprout new outgoing projections that help transfer excitatory activity to neurons in the LPZ. Also in accordance with experimental work, inhibitory neurons inside the LPZ form new outgoing connections that transmit inhibition to neurons outside the LPZ.

excitatory analogues [Mar+10; Mar+14]. In our simulations, the experimentally observed outward protrusion of inhibitory axons from the LPZ requires that the formation of inhibitory pre-synaptic elements is driven by reduced neuronal activity:

$$\frac{dz_{\text{pre}}^{\text{I}}}{dt} > 0 \quad \text{for} \quad [\text{Ca}^{2+}] < \psi \quad (7)$$

179 Similar to the post-synaptic growth rules, the pre-synaptic growth rules for excitatory and in-  
 180 hibitory neurons were also treated separately and their parameters were tuned iteratively over re-  
 181 peated simulations. Since inhibitory neurons form only one-fourth of the neuronal population, and  
 182 only a small number of these fall into the LPZ, our simulations require the growth rates of inhibitory  
 183 axonal elements to be high enough to stabilise the large number of hyperactive neurons outside the  
 184 LPZ (Table 2).

185 Figures 7a and 7b show the rewiring of axonal projections from an excitatory neuron in the peri-  
 186 LPZ and an inhibitory neuron in the centre of the LPZ, respectively. Following the growth functions  
 187 derived above, our simulations correctly reproduce the inward sprouting of excitatory axons into  
 188 the LPZ and the outward sprouting of inhibitory axons from the LPZ that is observed during the  
 189 repair process.

## 190 2.4 Post-synaptic growth rules stabilise individual neurons

191 Experimental evidence suggests that not just networks, but also individual neurons in the brain  
 192 maintain a finely tuned balance between excitation and inhibition (E-I balance) [OL08; OL09; IS11].  
 193 This raises the question whether the complementary nature of our excitatory and inhibitory post-  
 194 synaptic growth rules is sufficient to ensure stability at the level of single neurons.

195 Since the state of each neuron is tightly coupled to the states of other neurons in the network,  
 196 we modelled a neuron in isolation to investigate how its input connectivity would be affected by  
 197 changes in activity as per our post-synaptic growth curves (Figure 8a). The neuron is initialised  
 198 with an input connectivity similar to a neuron from the network in its steady state: it has the same  
 199 number of excitatory ( $z_{\text{post}}^{\text{E}}$ ) and inhibitory ( $z_{\text{post}}^{\text{I}}$ ) dendritic elements and receives the same mean  
 200 conductances through them ( $g_{\text{EE}}, g_{\text{IE}}$ ). Thus, the  $[\text{Ca}^{2+}]$  of the neuron in this state represents its  
 201 optimal activity ( $\psi = [\text{Ca}^{2+}]$  at  $t = 0$  s in Figure 8b). In this scenario, the net input conductance

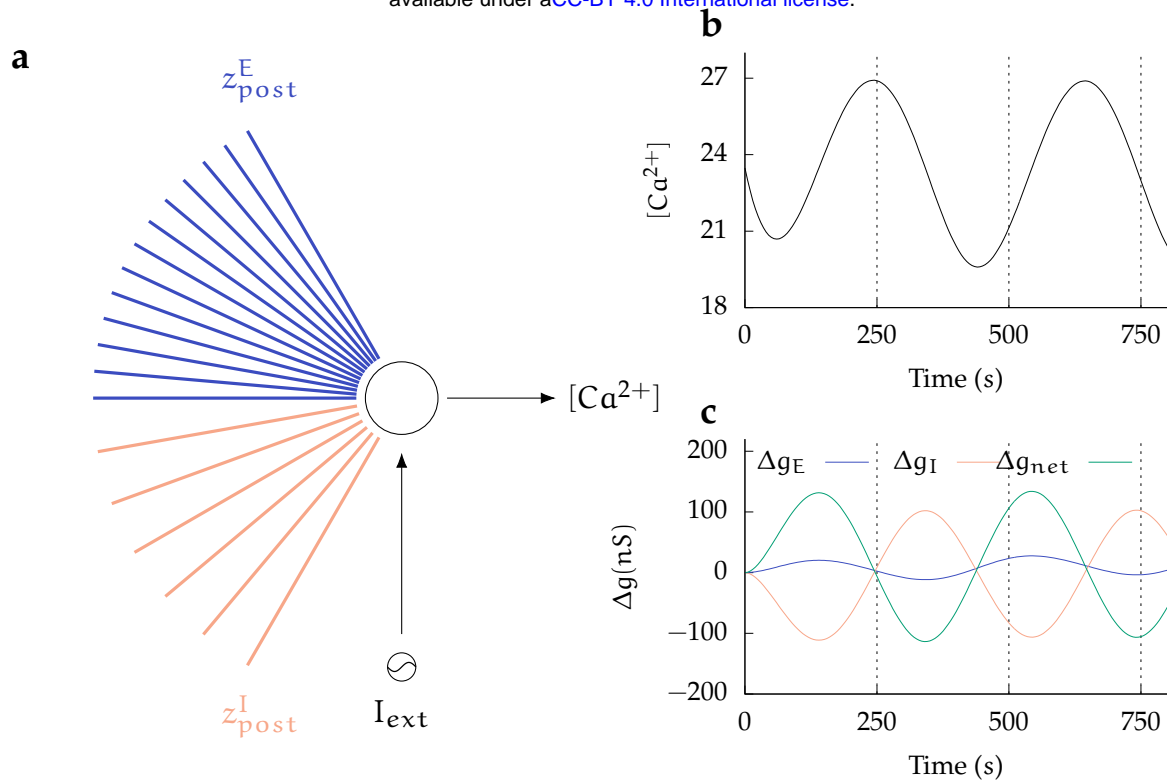

**Figure 8. Single neuron simulations show the homeostatic effect of the post-synaptic growth rules: (a)** A neuron in its steady state receives excitatory ( $g_E$ ) and inhibitory ( $g_I$ ) conductance inputs through its excitatory ( $z_{post}^E$ ) and inhibitory ( $z_{post}^I$ ) dendritic elements, respectively, such that its activity ( $[Ca^{2+}]$ ) is maintained at its optimal level ( $\psi$ ) by its net input conductance ( $g_{net}$ ). **(b)** An external sinusoidal current stimulus ( $I_{ext}$ ) is applied to the neuron to vary its activity from the optimal level. **(c)** Under the action of our post-synaptic growth curves, the neuron modifies its dendritic elements to change its excitatory ( $\Delta g_E$ ) and inhibitory ( $\Delta g_I$ ) conductance inputs such that the net change in its input conductance ( $\Delta g_{net}$ ) counteracts the change in its activity: an increase in  $[Ca^{2+}]$  due to the external stimulus is followed by a decrease in net input conductance through the post-synaptic elements and vice versa (dashed lines in Figures 8b and 8c).

202 received by the neuron ( $g_{net}$ ), which modulates its activity, can be estimated as the difference of the  
 203 total excitatory ( $g_E$ ) and inhibitory ( $g_I$ ) input conductances.

204 The activity of the neuron is then varied by an external sinusoidal current stimulus (Figure 8b). In  
 205 addition, the deviation of the neuron's excitatory ( $\Delta g_E$ ), inhibitory ( $\Delta g_I$ ), and net input conductance  
 206 ( $\Delta g_{net}$ ) from baseline levels due to the formation or removal of dendritic elements under the action  
 207 of the growth curves is recorded (Figure 8c). We find that that modifications of the input connectivity  
 208 of the neuron result in alterations to its excitatory and inhibitory input such that the net change in  
 209 its input conductance counteracts changes in its activity: an increase in  $[Ca^{2+}]$  due to the external  
 210 stimulus is followed by a decrease in net input conductance through the post-synaptic elements  
 211 and vice versa (dashed lines in Figures 8b and 8c). These simulation results show that even though  
 212 the activity dependent growth rules of excitatory and inhibitory post-synaptic elements are derived  
 213 from network simulations, they also serve a homeostatic function in single neurons.

## 214 2.5 Synaptic and structural plasticity are both necessary for repair

215 In all our previous simulations, the network rewiring after deafferentation of the LPZ occurred in  
 216 the presence of both activity-dependent structural plasticity and inhibitory synaptic plasticity. These  
 217 results show that both types of homeostatic plasticity can co-exist during successful network repair,  
 218 but they do not indicate their respective contributions to restoring activity in the network. In order  
 219 to study the functional role of the two plasticity mechanisms in the homeostatic regulation of activity  
 220 after peripheral lesions, we simulated our model with each the mechanisms enabled in isolation (see  
 221 Methods).

222 Results from our simulations where structural plasticity is disabled suggest that inhibitory synap-  
 223 tic plasticity alone, while able to re-balance neurons outside the LPZ by increasing the strength of  
 224 their inhibitory inputs, fails to restore activity in the deprived neurons in the LPZ even after small  
 225 peripheral lesions (Figure 9a, and 9d). Although the homeostatic inhibitory synaptic plasticity on  
 226 its own leads to a reduction in conductances of the inhibitory synapses projecting onto neurons in  
 227 the LPZ, this is not sufficient to reactivate them. The stabilisation of activity in the neurons outside  
 228 the LPZ, however, is successful due to the strengthening of IE synapses by STDP. In the absence of  
 229 network rewiring by structural plasticity, this leads to a network where the neurons outside the LPZ

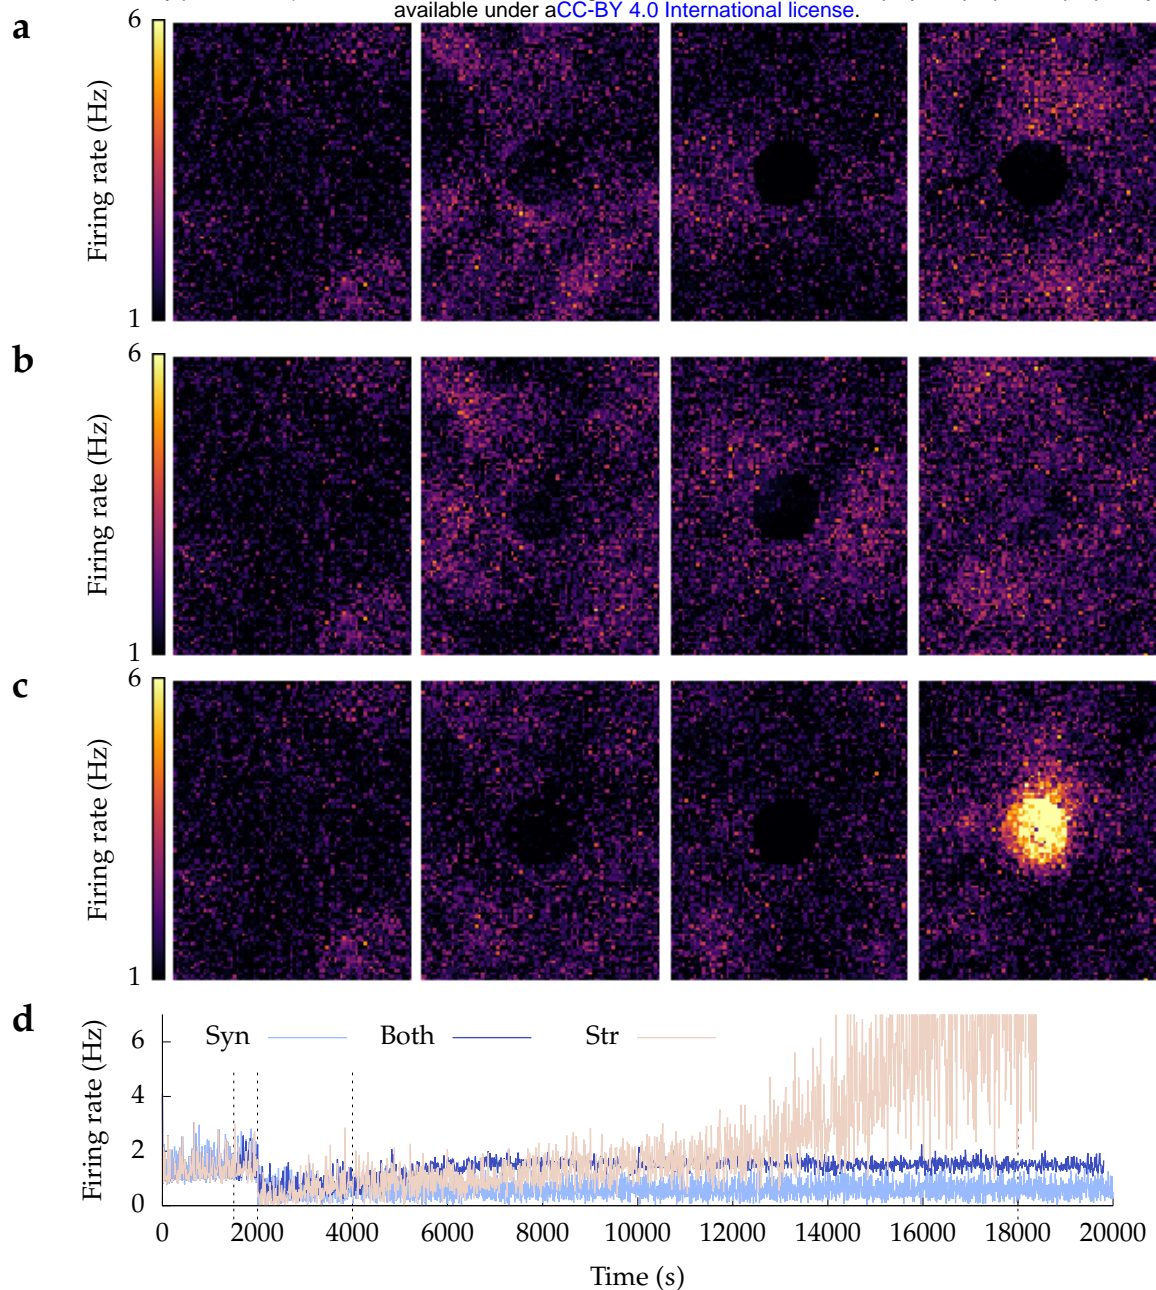

**Figure 9. Both structural and synaptic plasticity are required for restoration of activity after deafferentation:** (a), (b), (c) show firing rate snapshots of neurons at  $t = 1500$  s,  $2001.5$  s,  $4000$  s,  $18000$  s. (a) Synaptic plasticity only: after the network has settled in its physiological state by means of synaptic plasticity, structural plasticity is not enabled. With only synaptic plasticity present, the network is unable to restore activity to neurons in the LPZ. Neurons outside the LPZ return to their balanced state, but the neurons in the LPZ are effectively lost to the network. (b) Both structural and synaptic plasticity are enabled: neurons in the LPZ regain their low firing rate as before deafferentation. (c) Structural plasticity only: after the network has settled in its physiological state by means of synaptic plasticity, homeostatic synaptic plasticity is turned off and only structural plasticity is enabled. With only structural plasticity present, activity returns to neurons in the LPZ but does not stabilise in a low firing rate regime. The firing rate of these neurons continues to increase and, as a result, these neurons continue to turn over synaptic elements. This cascades into increased activity in neurons outside the LPZ, further causing undesired changes in network connectivity. (d) shows the mean population firing rates of neurons in the centre of the LPZ for the three simulation configurations. (Panel 1 is identical in all three simulation configurations because the same parameters are used to initialise all simulations.)

230 retain their functionality while the LPZ is effectively lost. This indicates that the larger deviations  
 231 from the desired activity that result from deafferentation in our balanced network model require the  
 232 reconfiguration of network connectivity by structural plasticity to re-establish a functional balance.

233 Simulations where homeostatic synaptic plasticity was disabled, on the other hand, also failed  
 234 to re-establish the balanced state of the network before the peripheral lesion (Figure 9c, and 9d).  
 235 While the activity of the deprived neurons in the LPZ initially increased back to pre-lesion levels,  
 236 under the action of structural plasticity only, the network eventually started exhibiting abnormally  
 237 high firing rates instead of settling in the desired low firing rate regime. These results suggest that

238 inhibitory synaptic plasticity is required to finely tune inputs to neurons so that the network can  
239 achieve its balanced state.

240 Thus, our simulations predict that both homeostatic processes are required for successful repair—  
241 structural plasticity for larger changes in network connectivity and synaptic plasticity for the fine  
242 tuning of conductances that establishes stable activity in the network. These results support the  
243 idea that multiple plasticity mechanisms work in harmony to sustain functional brain networks at  
244 varying time scales.

### 245 3 Discussion

246 A better understanding of the factors that influence dynamic alterations in the morphology and con-  
247 nectivity of neuronal axons and dendrites is necessary to improve our knowledge of the processes  
248 that shape the development and reorganisation of neuronal circuitry in the adult brain. Here, we  
249 present a new, spiking neural network model of peripheral lesioning in a simplified cortical bal-  
250 anced asynchronous irregular network (Figure 1 and 2). We show that our simulations reproduce  
251 the time course of changes in network connectivity as reported in experimental work (Figure 3), and  
252 we provide a number of testable predictions.

253 First, our model suggests that deafferentation does not necessarily result in the loss or even a  
254 decrease of activity in all neurons of the network. Neurons outside the LPZ experience a gain in  
255 activity because of a net loss in inhibition in our simulations. This prediction should be tested in  
256 future experiments that investigate neuronal activity just outside the LPZ.

257 Secondly, our model suggests that while the network may restore its mean activity, the temporal  
258 fine structure of the activity, and in particular the AI firing characteristic of the network are per-  
259 manently disturbed by deafferentation. This change in firing patterns of the network also merits  
260 experimental validation, especially given its implications for network function. Synchronous firing  
261 in the network may not be evident in studies of the mapping between peripheral inputs and net-  
262 work activity. However, in combination with the change in network connectivity, it can affect other  
263 types of network function, such as the storage and recall of associative memory. By storing Hebbian  
264 assemblies in the network and testing their recall after deafferentation and repair, we are currently  
265 exploring this phenomenon.

266 Thirdly, as the main objective of our work, we suggest different growth rules for differnt types  
267 of neurite (Figure 4). While derived from network lesion experiments that were not aimed at study-  
268 ing the relation between activity and neurite turnover [Tra+02; HS05; Kec+08; Yam+09; Mar+10;  
269 Che+11; Kec+11; Mar+14], evidence from other work seems to support our proposals. Our growth  
270 rule for excitatory dendritic elements is coherent with results from an experimental study in hip-  
271 pocampal slice cultures. In their study, Richards et al. note that reduced neuronal activity resulted  
272 in the extension of glutamate receptor-dependent processes from dendritic spines of CA1 pyrami-  
273 dal neurons [Ric+05]. Furthermore, the predicted growth function for inhibitory dendritic elements  
274 is supported by a study by Knott et. al [Kno+02], which reports an increase in inhibitory inputs to  
275 spines in adult mice after their activity was increased by whisker stimulation [Kno+02].

276 On the pre-synaptic side, axonal turnover and guidance has been investigated in much detail,  
277 and is known to be a highly complex process incorporating multiple biochemical pathways [LV09;  
278 Goo13]. Our hypothesis regarding excitatory pre-synaptic structures is supported by a report by  
279 Perez et al. who find that CA1 pyramidal cells, which become hyper-excitabile following hippo-  
280 campal kainate lesions, sprout excitatory axons that may contribute to the epileptiform activity in the  
281 region [Per+96]. For inhibitory pre-synaptic elements, we refer to Schuemann et al. who report that  
282 enhanced network activity reduced the number of persistent inhibitory boutons [Sch+13] over short  
283 periods of time (30 minutes) in organotypic hippocampal slice cultures. However, these experiments  
284 also found that prolonged blockade of activity (over seven days) did not affect inhibitory synapses,  
285 contrary to the reports from peripheral lesion studies [Kec+11; Che+12].

286 Indirect evidence on the temporal evolution of inhibitory projections to neurons in the LPZ fur-  
287 ther supports the inhibitory growth rules in our model (Figure 5d). While an initial disinhibition  
288 aids recovery in these deprived neurons, as activity is restored, a subsequent increase in inhibi-  
289 tion in our simulations re-establishes the E-I balance in the deafferented region. This is in line with  
290 evidence that the pharmacological reduction of inhibition restores structural plasticity in the vi-  
291 sual cortex [Vet+08]. Our simulations, therefore, support the proposed role of inhibition as control  
292 mechanism for the critical window for structural plasticity [GLK91; Ros+95; FH00; Mas+03; Hen05;  
293 Ver+12].

294 Our simulation results do not imply that these are the only activity dependent growth rules that  
295 can underlie the turnover of neurites. Given the variety of neurons in the brain, many families of  
296 growth rules may apply to neurons. For example, Butz and van Ooyen proposed a different set of  
297 growth rules using a model of peripheral lesioning in fast spiking neurons that did not investigate  
298 the low firing AI state [BO13]. Different growth rules could therefore apply to brain regions with  
299 different neuronal types and firing characteristics.

300 Finally, our simulation results indicate that the suggested growth rules, while derived from net-  
301 work simulations, can contribute to the stability of activity in individual neurons (Figure 8). Since  
302 structural plasticity and synaptic plasticity are not independent processes in the brain, this is not a  
303 wholly surprising result. Structural plasticity of the volumes of spines and boutons underlies the  
304 modulation of synaptic efficacy by synaptic plasticity. Thus, given that synaptic plasticity mecha-  
305 nisms can stabilise the firing of individual neurons [Tur08; Kec+13], it follows that structural plastic-  
306 ity mechanisms could also be involved. Further, extending from the functional coupling of synaptic  
307 and structural plasticity, our simulations also require both structural and synaptic plasticity for suc-  
308 cessful network repair (Figure 9). Thus, our simulation results lend further support to the notion  
309 that multiple plasticity mechanisms function in a cooperative manner in the brain.

310 As a computational modelling study, our work necessarily suffers from various limitations. For  
311 example, while the use of simple conductance based point neurons [MBC04] is sufficient for our  
312 network study, perhaps even necessary for its tractability [Izh04], it also limits our work. Unlike  
313 in the brain where calcium is compartmentalised in neurons [YMH00], a single compartment point  
314 neuron model only allows one value of  $[Ca^{2+}]$  for all neurites in a neuron. Thus, each of the neurons  
315 in our model can only either sprout or retract a type of neurite at a point in time. This is not the case  
316 in biology where different parts of the neuron can undergo structural changes independently of each  
317 other. The growth regimes suggested in our work must be understood to address the net formation  
318 or removal of neurites only. Furthermore, since a simultaneous homeostatic regulation of different  
319 neuronal compartments would be expected to have a larger stabilising effect on the overall activity  
320 of the neuron, a single compartment neuron model may also limit the homeostatic effect of the  
321 structural plasticity mechanism. Point neurons also lack morphology, and our model is therefore  
322 unable to explicitly include the directional formation or removal of synapses. Axonal and dendritic  
323 arbors are not explicitly modelled and the directional turnover of synapses that represents axonal  
324 sprouting emerges merely from the numbers of connecting partner neurites. Additionally, while  
325 it was enough for neurons in our model to be distributed in a two dimensional grid to include a  
326 spatial component, this is clearly not true for the brain. Thus, while our model provides a simplified  
327 high level view, the investigation of our proposed activity dependent growth rules in more detailed  
328 models is an important avenue for future research.

329 Finally, this work, and computational modelling of structural plasticity in general, are limited  
330 by the lack of supporting simulation tools. Most current simulators are designed for network mod-  
331 elling where synaptic connectivity remains constant. Even the NEST simulator [Jor+19], where the  
332 internal data structures are sufficiently flexible to allow for modification of synapses during sim-  
333 ulation [Jor+18], currently includes a limited implementation of the MSP algorithm [Dia+16]. To  
334 incorporate the missing pieces— spatial information and different network connectivity modifica-  
335 tion strategies, for example—we were required to repeatedly pause simulations to make connectiv-  
336 ity updates. This is far less efficient than NEST handling these changes in connectivity internally  
337 during continuous simulation runs and added a large overhead to the computational costs of our  
338 simulations. The development of companion tools for modelling structural plasticity is however,  
339 gradually gaining traction [Now+18] with discussions to allow NEST to communicate with stand  
340 alone structural plasticity tools via interfaces such as Connection Set Algebra [Dju12] ongoing.

341 In conclusion, we present a new general model of peripheral lesioning and repair in simplified  
342 cortical spiking networks with biologically realistic AI activity that provides several experimentally  
343 testable predictions.

## 344 4 Methods

345 We build on and extend the MSP [BO13] framework to model the activity dependent dynamics  
346 of synaptic elements. We developed our new model using the NEST neural simulator [Epp+08;  
347 Pey+17]. NEST includes an early, partial implementation of the MSP [Dia+16]. It does not, for ex-  
348 ample, currently take spatial information into account while making connectivity updates. More im-  
349 portantly, at this time, the design of the C++ codebase also does not provide access to the lower level  
350 rules governing updates in connectivity via the Python API. Making modifications to these to exe-  
351 cute new structural plasticity connectivity rules, therefore, requires non-trivial changes to the NEST  
352 kernel. Given that work is on-going to modularise the implementation of structural plasticity in  
353 NEST such that the computation of changes in connectivity will be left to stand-alone tools that will  
354 communicate them to the simulator using interfaces such as the Connection Set Algebra [Dju12] (pri-  
355 vate communications with the NEST development team), we resorted to disabling connectivity up-  
356 dates in NEST. Instead, we generate connectivity based on our new hypotheses using native Python  
357 methods, and use the methods available in PyNEST to modify them in simulations. Our modified  
358 version of the NEST source code is available in our fork of the simulator available in a public repos-  
359 itory at <https://github.com/sanjayankur31/nest-simulator/tree/disable-str-pl-updates>.

360 To honour our commitment to Open Science [Gle+17], we only made use of Free/Open source  
361 software for our work. The complete source code of all simulations run in this work are available

**Table 1.** Neuronal parameters

| Parameter                               | Symbol             | Value  |
|-----------------------------------------|--------------------|--------|
| LIF parameters                          |                    |        |
| Refractory period                       | $t_{ref}$          | 5 ms   |
| Reset potential                         | $V_{reset}$        | -60 mV |
| Threshold potential                     | $V_{th}$           | -50 mV |
| Capacitance                             | $C$                | 200 pF |
| Leak conductance                        | $g_L$              | 10 nS  |
| Leak reversal potential                 | $E_L$              | -60 mV |
| Inhibitory reversal potential           | $E_{inh}$          | -80 mV |
| Excitatory reversal potential           | $E_{exc}$          | 0 mV   |
| Excitatory time constant                | $\tau_{exc}$       | 5 ms   |
| Inhibitory time constant                | $\tau_{inh}$       | 10 ms  |
| [Ca <sup>2+</sup> ] increase per spike  | $\beta$            | 0.1    |
| [Ca <sup>2+</sup> ] decay time constant | $\tau_{[Ca^{2+}]}$ | 50 s   |
| External inputs                         |                    |        |
| Poisson spike input to all neurons      | $r_{ext}$          | 10 Hz  |
| External projections to E neurons       | $g_{ext}^E$        | 8 nS   |
| External projections to I neurons       | $g_{ext}^I$        | 12 nS  |

362 in GitHub repositories [here](#) and [here](#) (these repositories are currently private). The scripts used to  
 363 analyse the data generated by the simulation are available in a separate GitHub repository [here](#).  
 364 These repositories are licensed under the [Gnu GPL license \(version 3 or later\)](#). The data generated  
 365 by the simulations has been made available here (the data will be uploaded to a service suggested  
 366 by the reviewers, such as Zenodo).

#### 367 4.1 Neuron model

368 Neurons are modelled as leaky integrate and fire conductance based point neurons with exponential  
 369 conductances [MBG04], the membrane potentials of which are governed by:

$$C \frac{dV}{dt} = -g_L(V - E_L) - g_{exc}(V - E_{exc}) - g_{inh}(V - E_{inh}) + I_e \quad (8)$$

370 where  $C$  is the membrane capacitance,  $V$  is the membrane potential,  $g_L$  is the leak conductance,  $g_{exc}$   
 371 is the excitatory conductance,  $g_{inh}$  is the inhibitory conductance,  $E_L$  is the leak reversal potential,  
 372  $E_{exc}$  is the excitatory reversal potential,  $E_{inh}$  is the inhibitory reversal potential, and  $I_e$  is an external  
 373 input current. Incoming spikes induce a post-synaptic change of conductance that is modelled by  
 374 an exponential waveform following the equation:

$$g(t) = \bar{g} \exp\left(-\frac{t - t_s}{\tau_g}\right) \quad (9)$$

375 where  $\tau_g$  is the decay time constant and  $\bar{g}$  is the maximum conductance as the result of a spike at  
 376 time  $t_s$ . Table 1 enumerates the constants related to the neuron model.

377 Each neuron possesses sets of both pre- and post-synaptic synaptic elements, the total numbers  
 378 of which are represented by ( $z_{pre}$ ) and ( $z_{post}$ ) respectively. Excitatory and inhibitory neurons only  
 379 possess excitatory ( $z_{pre}^E$ ) and inhibitory axonal elements ( $z_{pre}^I$ ) respectively, but they can each host  
 380 both excitatory and inhibitory dendritic elements ( $z_{post,E}$ ,  $z_{post,I}$ ) (since the number of neurites  
 381 must be a non-negative integer, the floor value of the continuous variable is used for connectivity  
 382 updates). As in MSP, we model the rate of change of each type of synaptic element, ( $dz/dt$ ), as a  
 383 Gaussian function of the neuron's "Calcium concentration" ( $[Ca^{2+}]$ ):

$$\frac{d[Ca^{2+}]}{dt} = \begin{cases} -\frac{[Ca^{2+}]}{\tau_{[Ca^{2+}]}} + \beta, & \text{if } V \geq V_{th} \\ -\frac{[Ca^{2+}]}{\tau_{[Ca^{2+}]}}', & \text{otherwise.} \end{cases} \quad (10)$$

Here,  $\tau_{[Ca^{2+}]}$  is the time constant with which the  $[Ca^{2+}]$  decays in the absence of a spike, and  $\beta$   
 is the constant increase in  $[Ca^{2+}]$  caused by each spike. Based on evidence that the outgrowth of  
 synaptic structures depends on the concentration of intracellular calcium in neurons [LK89; KL95],

**Table 2.** Growth rule parameters

| Parameter                                                              | Symbol                                   | Value                      |
|------------------------------------------------------------------------|------------------------------------------|----------------------------|
| Optimal $[Ca^{2+}]$                                                    | $\psi$                                   |                            |
| Excitatory neurons                                                     |                                          |                            |
| Scaling factor: pre-synaptic structures ( $z_{pre}^E$ )                | $v_{pre}^E$                              | $15 \times 10^{-4}$        |
| Vertical shift                                                         | $\omega_{pre}^E$                         | $1 \times 10^{-2}$         |
| X-axis parameters                                                      | $(\eta_{pre}^E, \epsilon_{pre}^E)$       | $(\psi, 1.75 \times \psi)$ |
| Decay rate                                                             | $\tau_{pre,free}^E$                      | 0.01                       |
| Scaling factor: excitatory post-synaptic structures ( $z_{post,E}^E$ ) | $v_{post,E}^E$                           | $3 \times 10^{-5}$         |
| Vertical shift                                                         | $\omega_{post,E}^E$                      | $4 \times 10^{-1}$         |
| X-axis parameters                                                      | $(\eta_{post,E}^E, \epsilon_{post,E}^E)$ | $(0.25 \times \psi, \psi)$ |
| Decay rate                                                             | $\tau_{post,E,free}^E$                   | 0.01                       |
| Scaling factor: inhibitory post-synaptic structures ( $z_{post,I}^E$ ) | $v_{post,I}^E$                           | $3 \times 10^{-4}$         |
| Vertical shift                                                         | $\omega_{post,I}^E$                      | $4 \times 10^{-2}$         |
| X-axis parameters                                                      | $(\eta_{post,I}^E, \epsilon_{post,I}^E)$ | $(\psi, 3.5 \times \psi)$  |
| Decay rate                                                             | $\tau_{post,I,free}^E$                   | 0.01                       |
| Inhibitory neurons                                                     |                                          |                            |
| Scaling factor: pre-synaptic structures ( $z_{pre}^I$ )                | $v_{pre}^I$                              | $3 \times 10^{-2}$         |
| Vertical shift                                                         | $\omega_{pre}^I$                         | $4 \times 10^{-4}$         |
| X-axis parameters                                                      | $(\eta_{pre}^I, \epsilon_{pre}^I)$       | $(0.25 \times \psi, \psi)$ |
| Decay rate                                                             | $\tau_{pre,free}^I$                      | 0.01                       |
| Scaling factor: excitatory post-synaptic structures ( $z_{post,E}^I$ ) | $v_{post,E}^I$                           | $3 \times 10^{-5}$         |
| Vertical shift                                                         | $\omega_{post,E}^I$                      | $4 \times 10^{-1}$         |
| X-axis parameters                                                      | $(\eta_{post,E}^I, \epsilon_{post,E}^I)$ | $(0.25 \times \psi, \psi)$ |
| Decay rate                                                             | $\tau_{post,E,free}^I$                   | 0.01                       |
| Scaling factor: inhibitory post-synaptic structures ( $z_{post,I}^I$ ) | $v_{post,I}^I$                           | $3 \times 10^{-5}$         |
| Vertical shift                                                         | $\omega_{post,I}^I$                      | $4 \times 10^{-1}$         |
| X-axis parameters                                                      | $(\eta_{post,I}^I, \epsilon_{post,I}^I)$ | $(\psi, 3.5 \times \psi)$  |
| Decay rate                                                             | $\tau_{post,I,free}^I$                   | 0.01                       |

the rate of change of each type of synaptic element,  $(dz/dt)$  is given by:

$$\frac{dz}{dt} = v \left( 2 \exp \left( -\left( \frac{[Ca^{2+}] - \xi}{\zeta} \right)^2 \right) - \omega \right)$$

$$\xi = \frac{\eta + \epsilon}{2}, \quad (11)$$

$$\zeta = \frac{\eta - \epsilon}{2\sqrt{-\ln(\omega/2)}}$$

Here,  $v$  is a scaling factor,  $\xi$  and  $\zeta$  define the width and location of the Gaussian curve on the x-axis, while  $\omega$  controls the location of the curve on the y-axis ( $0 < v$ ,  $0 < \eta < \epsilon$ ,  $0 < \omega < 2$ ). Given that  $([Ca^{2+}] > 0)$ ,  $(dz/dt)$  is bound as:

$$\min \left( \frac{dz}{dt} \right) = -v\omega \quad \text{for} \quad ([Ca^{2+}] \rightarrow \infty)$$

$$\max \left( \frac{dz}{dt} \right) = v(2 - \omega) \quad \text{for} \quad \left( [Ca^{2+}] = \left( \frac{\eta + \epsilon}{2} \right) \right) \quad (12)$$

Within these bounds, as shown in Figure 2,  $(dz/dt)$  is:

$$\begin{aligned} &> 0 \quad \text{for} \quad \eta < [Ca^{2+}] < \epsilon \\ &= 0 \quad \text{for} \quad [Ca^{2+}] = \{\eta, \epsilon\} \\ &< 0 \quad \text{for} \quad [Ca^{2+}] < \eta \cup [Ca^{2+}] > \epsilon \end{aligned} \quad (13)$$

384 If, based on its activity, a neuron has more synaptic elements of a particular type ( $z$ ) than are cur-  
 385 rently engaged in synapses ( $z_{connected}$ ), the free elements ( $z_{free}$ ) can participate in the formation



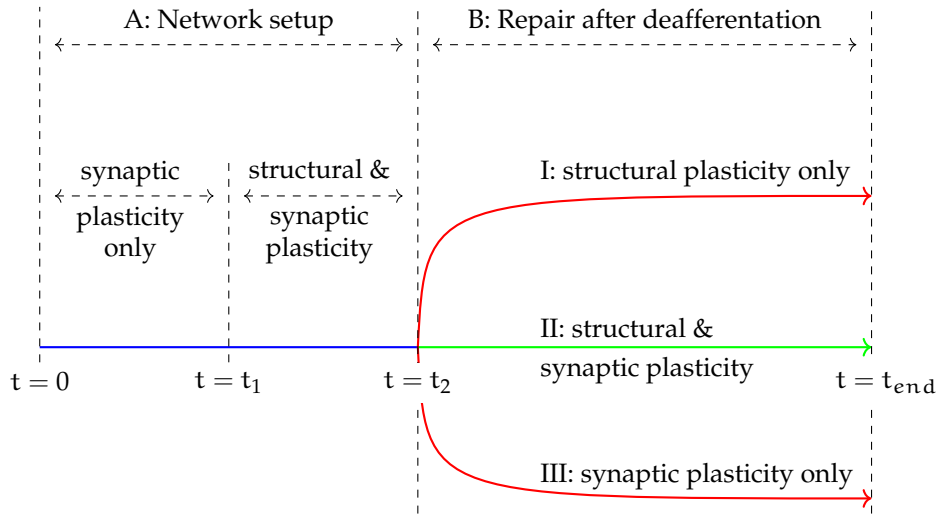

**Figure 10.** The simulation runs in 2 phases. Initially, the setup phase ( $0 < t < t_2$ ) is run to set the network up to the balanced AI state. At ( $t = t_2$ ), a subset of the neuronal population is deafferented to simulate a peripheral lesion and the network is allowed to organise under the action of homeostatic mechanisms until the end of the simulation at ( $t = t_{end}$ ). Each homeostatic mechanism can be enabled in a subset of neurons to analyse its effects on the network after deafferentation.

386 of new synapses at the next connectivity update step:

$$z_{free} = \lfloor (z - z_{connected}) \rfloor \quad (14)$$

387 However, if they remain unconnected, they decay at each integration time step with a constant rate

388  $\tau_{free}$ :

$$z_{free} = \lfloor (z_{free} - (\tau_{free} z_{free})) \rfloor \quad (15)$$

389 On the other hand, a neuron will lose  $z_{loss}$  synaptic connections if the number of a synaptic element  
390 type calculated by the growth rules ( $z$ ) is less than the number of connected synaptic elements of  
391 the same type ( $z_{connected}$ ):

$$z_{loss} = \lfloor (z_{connected} - z) \rfloor \quad (16)$$

392 Table 2 lists the parameters governing the growth rules for all neurites.

## 393 4.2 Network simulations

394 Our network model is derived from the cortical network model proposed by Vogels et al. [Vog+11]  
395 that is balanced by inhibitory homeostatic STDP. Like the cortex, this network model is character-  
396 ised by low frequency AI firing of neurons. Additionally, this network model has also been  
397 demonstrated to store attractorless associative memories for later recall. The simulation is divided  
398 into multiple phases, as shown in Figure 10. These are documented in the following sections in  
399 detail.

### 400 4.2.1 Initial network structure

401 We simulate a network of  $N_E$  excitatory and  $N_I$  inhibitory neurons ( $N_E/N_I = 4$ ). Excitatory neu-  
402 rons are distributed in a two-dimensional rectangular plane such that the distance between two  
403 adjacent excitatory neurons is  $(\mu_d^E \pm \sigma_d^E)\mu m$ . Inhibitory neurons are scattered such that they are  
404 evenly dispersed among the excitatory neurons such that the mean distance between adjacent in-  
405 hibitory neurons is  $(\mu_d^I \pm \sigma_d^I)\mu m$ . The rectangular plane is wrapped around as a toroid to prevent  
406 any edge effects from affecting the simulation. Table 3 summarises the parameters used to arrange  
407 the neurons.

408 At ( $t = 0$  s in Figure 10), neurons in the network are connected such that the network has a  
409 sparsity of  $p$ . For each neuron,  $n_{out}$  targets are chosen from the complete set of possible post-  
410 synaptic neurons in a distance dependence manner as summarised in previous sections. Initially,  
411 static synapses in the network (II, IE, EI) are initialised to their mean conductances. The plastic (IE)  
412 synapses are subject to the homeostatic inhibitory synaptic plasticity mediated STDP rule proposed  
413 by Vogels, Sprekeler et al. [Vog+11] and are initialised to zero conductances.

414 External input to each neuron is modelled as an independent Poisson spike train with a mean  
415 firing rate  $r_{ext}$ . These spike trains project on to excitatory and inhibitory neurons via static excita-  
416 tory synapses with conductances  $g_{ext}^E$  and  $g_{ext}^I$  respectively. Figure 1a shows the various sets of  
417 synapses in the network.

**Table 3.** Network simulation parameters

| Parameter                             | Symbol           | Value                                    |
|---------------------------------------|------------------|------------------------------------------|
| Simulation parameters                 |                  |                                          |
| Integration time step                 | $dt$             | 0.1 s                                    |
| Structural plasticity update interval |                  | 1 s                                      |
| Network parameters                    |                  |                                          |
| Number of E neurons                   | $N_E$            | 8000                                     |
| Number of I neurons                   | $N_I$            | 2000                                     |
| Dimension of 2D E neuron lattice      |                  | $100 \times 80$                          |
| Dimension of 2D I neuron lattice      |                  | $50 \times 40$                           |
| Mean distance between E neurons       | $\mu_d^E$        | $150 \mu\text{m}$                        |
| STD distance between E neurons        | $\sigma_d^E$     | $15 \mu\text{m}$                         |
| Mean distance between I neurons       | $\mu_d^I$        | $300 \mu\text{m}$                        |
| STD distance between I neurons        | $\sigma_d^I$     | $15 \mu\text{m}$                         |
| Neurons in LPZ C                      |                  | 2.5 %                                    |
| Neurons in LPZ B                      |                  | 2.5 %                                    |
| Neurons in P LPZ                      |                  | 5 %                                      |
| Remaining neurons                     |                  | 90 %                                     |
| Initial network sparsity              | $p$              | 0.02                                     |
| Initial out-degree                    | $n_{\text{out}}$ | $p \times \text{total possible targets}$ |
| Simulation stages                     |                  |                                          |
| Synaptic plasticity only              |                  | 1500 s                                   |
| Synaptic and structural plasticity    |                  | 500 s                                    |
| Network deafferented at               |                  | 2000 s                                   |

#### 4.2.2 Initial stabilisation to physiological state

The simulation is then started and the network permitted to stabilise to its balanced AI state until ( $t = t_2$  in Figure 10). This phase consists of two simulation regimes. Initially, only inhibitory synaptic plasticity is activated to stabilise the network ( $t < t_1$  in Figure 10).

As this state ( $t = t_2$  in Figure 10) is considered the normal physiological state of our network model, the network parameters obtained at this point are set as the steady state parameters of neurons and synapses in the network. The optimal activity of each neuron,  $\psi$ , is set to the activity achieved by the neuron at this point, and its growth curves are initialised in relation to it. The mean conductance for new IE synapses is also set as the mean conductance of the IE synapses obtained at this stage.

Our implementation of homeostatic structural plasticity is then activated in the network at this point ( $t = t_1$  in Figure 10) to verify that the network continues to remain in its balanced AI state in the presence of both homeostatic mechanisms.

#### 4.2.3 Simulation of peripheral lesion

Next at ( $t = t_2$  in Figure 10), the external Poisson spike train inputs are disconnected from excitatory and inhibitory neurons that fall in the LPZ to simulate a peripheral lesion in the network. For analysis, the neuronal plane is classified into four regions:

- LPZ C: the centre of the LPZ (Red in Figure 1b).
- LPZ B: the inner border of the LPZ (Yellow in Figure 1b).
- P LPZ: peri-LPZ, the outer border of the LPZ (Green in Figure 1b).
- Other neurons: neurons further away from the LPZ (Grey in Figure 1b).

#### 4.2.4 Network reorganisation

The deafferented network is permitted to reorganise itself under the action of the active homeostatic mechanisms until the end of the simulation ( $t = t_{\text{end}}$  in Figure 10). By selectively activating the two homeostatic mechanisms in different simulation runs, we were also able to investigate their effects on the network in isolation.

**Table 4.** Synapse parameters

| Parameter                                               | Symbol                 | Value                      |
|---------------------------------------------------------|------------------------|----------------------------|
| Unit conductance                                        | $\bar{g}$              | $(0.5 \pm 0.1) \text{ nS}$ |
| EE synapse conductance                                  | $g_{EE}$               | $\bar{g}$                  |
| EI synapse conductance                                  | $g_{EI}$               | $\bar{g}$                  |
| II synapse conductance                                  | $g_{II}$               | $10\bar{g}$                |
| IE synapse conductance                                  | $g_{IE}$               | Vogels-Sprekeler STDP      |
| STDP rule time constant                                 | $\tau_{\text{STDP}}$   | 20 ms                      |
| Target constant                                         | $\alpha_{\text{STDP}}$ | 0.12                       |
| STDP learning rate                                      | $\eta_{\text{STDP}}$   | 0.05                       |
| Width multiplier: excitatory synapses                   | $w_E$                  | 8                          |
| Width multiplier: inhibitory synapses                   | $w_I$                  | 24                         |
| Maximum probability of formation: excitatory synapses   | $\hat{p}_E$            | 0.8                        |
| Maximum probability of formation: inhibitory synapses   | $\hat{p}_I$            | 0.3                        |
| Conductance threshold for deletion: inhibitory synapses | $g_{\text{th}}$        |                            |

444 **Structural plasticity mediated connectivity updates** All synapses in the network, except the con-  
 445 nections that project the external stimulus on to the neuronal population, are subject to structural  
 446 plasticity (Figure 1a).

447 Free excitatory pre-synaptic and excitatory post-synaptic elements can combine to form excita-  
 448 tory synapses (EE, EI). Analogously, inhibitory pre-synaptic and inhibitory post-synaptic elements  
 449 can plug together to form inhibitory synapses (II, IE). The set of possible partners for a neuron,  
 450 therefore, comprises of all other neurons in the network that have free synaptic elements of the re-  
 451 quired type. From this set,  $z_{\text{free}}$  partners are chosen based on a probability of formation,  $p_{\text{form}}$ ,  
 452 which is a Gaussian function of the distance between the pair,  $d$ :

$$p_{\text{form}} = \hat{p} \exp^{-\left(d/(w\mu_d^E)\right)^2} \quad (17)$$

453 Here,  $\hat{p} \in \{\hat{p}_E, \hat{p}_I\}$  is the maximum probability,  $\mu_d^E$  is the mean distance between two adjacent ex-  
 454 citatory neurons, and  $w \in \{w_E, w_I\}$  is a multiplier that controls the spatial extent of new synaptic  
 455 connections.

456 Investigations indicate that lateral connections in the primary visual cortex are organised in a  
 457 “Mexican hat” pattern. While experimental work does support the presence of the “Mexican hat”  
 458 pattern [Liu+11; HHC13], anatomical research suggests that inhibitory connections are more lo-  
 459 calised than excitatory ones, contradicting the traditional use of shorter excitatory and longer in-  
 460 hibitory connections in computer models [Ste+09]. Analysis of the local cortical circuit of the pri-  
 461 mary visual cortex suggests that the “Mexican hat” pattern can either be generated by narrow but  
 462 fast inhibition, or broad and slower inhibition that may be provided by longer axons of GABAer-  
 463 gic basket cells [KSS03; Rud+13]. Investigations into the maintenance of the “Mexican hat” pattern  
 464 are beyond the scope of this study. We therefore, limit ourselves to the traditional model of longer  
 465 inhibitory connections and shorter local excitatory connections in this work by using a larger multi-  
 466 plier for inhibitory synapses,  $w_I$ , than for excitatory synapses,  $w_E$ , ( $w_E < w_I$ ).

467 New synapses that are added to the network are initialised with conductances similar to that  
 468 of existing synapses in the balanced network. Their conductance values are taken from a Gaussian  
 469 distribution centred at the mean conductance for that synapse type. Since new synapses can, there-  
 470 fore, be weaker or stronger than existing ones, this prevents the same set of synapses from being  
 471 modified in each connectivity update.

472 In spite of them being plastic, the same method is also used for IE synapses. IE synapses are  
 473 initialised with zero conductances at the start of the simulation and modify their strengths based  
 474 on STDP [Vog+11]. When the network has achieved the balanced AI state, these conductances also  
 475 settle at higher values. If new IE synapses formed after this point by structural plasticity were to  
 476 be initialised to zero conductances, they would most likely be selected for deletion repeatedly as  
 477 the weakest ones. STDP does not modulate inactive synapses either—synapses between pairs of  
 478 neurons that have both been rendered inactive by deafferentation will not be weakened, and may  
 479 not be lost. Therefore, to ensure the turnover of a diverse set of IE synapses also, new connections of  
 480 this type are supplied with conductances similar to that of existing stable IE synapses in the balanced  
 481 network.

482 Experimental evidence suggests that the stability of synapses is proportional to their efficacy [Tra+02;  
 483 Kno+06]. Taking this into account, we calculate the probability of deletion of a synapse,  $p_{\text{del}}$ , as a  
 484 function of its conductance  $g$ :

$$p_{\text{del}} = \exp^{-\left(\frac{g}{2g_{\text{th}}}\right)^2} \quad (18)$$

485 Here,  $g_{th}$  is a threshold conductance value calculated during the simulation, synapses stronger than  
486 which are considered immune to activity dependent changes in stability. They are removed from the  
487 list of options from which  $z_{loss}$  synapses are selected for deletion and are therefore, not considered  
488 for deletion at all.

489 For simplicity, for static excitatory synapses that all have similar conductances (EI, EE), we do not  
490 use this method of deletion. Instead, for these,  $z_{loss}$  connections are randomly selected for deletion  
491 from the set of available candidates. While II synapses are also static, the deletion of an inhibitory  
492 synapse by the loss of an inhibitory post-synaptic element can occur by the removal of either an IE  
493 or an II synapse. Therefore, to permit competition between II and IE synapses for removal, we apply  
494 weight based deletion to both these synapse sets.

495 The numbers of synaptic elements are updated at every simulator integration time step inter-  
496 nally in NEST. Connectivity updates to the network, however, require updates to internal NEST  
497 data structures and can only be made when the simulation is paused. This increases the computa-  
498 tional cost of the simulation, and we only make these updates at 1 s intervals. Gathering data on  
499 conductances, connectivity, and neuronal variables like  $[Ca^{2+}]$  also require explicit NEST function  
500 calls while the simulation is paused. Therefore, we also limit dumping the required data to files to  
501 regular intervals. Table 4 summarises the various synaptic parameters used in the simulation.

### 502 4.3 Single cell simulations

503 We also studied the effects of our structural plasticity hypotheses in individual neurons using single  
504 neuron simulations. Figure 8a shows a schematic of our single neuron simulations.

505 The neuron is initialised to a steady state where it exhibits an indegree similar to neurons in  
506 the network simulations when in their AI state. To do so, a constant baseline input current  $I_{ext}$   
507 is supplied to the neuron to provide it with activity. The  $[Ca^{2+}]$  obtained by the neuron at this  
508 time is assumed as its optimal level,  $\psi$ . Using identical values of  $\eta$  and  $\epsilon$  but different  $\nu$  values for  
509 excitatory and inhibitory post-synaptic elements ( $\nu_{post}^E = 4\nu_{post}^I$  to mimic the initial indegree of  
510 neurons in our network simulations), and an input current that deviates the activity of the neuron  
511 off its optimal level ( $< I_{ext}$ ), the neuron is made to sprout  $z_{post}^E, z_{post}^I$  excitatory and inhibitory  
512 post-synaptic elements respectively ( $z_{post}^E = 4z_{post}^I$ ). By assuming that each dendritic element  
513 receives inputs via conductances as observed in network simulations ( $g_{EE}, g_{IE}$ ), the net input to the  
514 neuron that results in its activity can be approximated as:

$$g_{net} = z_{post}^E g_{EE} - z_{post}^I g_{IE} \quad (19)$$

515 At this stage, the neuron resembles a one in network simulations in its balanced state before  
516 deafferentation. The current input is returned to its baseline value, thus returning the  $[Ca^{2+}]$  to  
517 its optimal value,  $\psi$ . In addition, the growth curves for the neuron are restored as per our activity  
518 dependent structural plasticity hypotheses to verify that the neuron does not undergo any structural  
519 changes at its optimal activity level.

520 The external current input to the neuron is modulated sinusoidally to fluctuate the neurons  
521  $[Ca^{2+}]$  (Figure 8b), and resultant changes in the numbers of its post-synaptic elements are recorded.  
522 As the neuron modifies its neurites, the change in excitatory and inhibitory input conductance re-  
523 ceived as a result is calculated (Figure 8c).

## 524 Author contributions and acknowledgements

525 Ankur Sinha devised the theory, did the computational modelling, post-processing, analysis, and  
526 wrote the paper.

527 Christoph Metzner helped with formulating the theory, the computational modelling, the anal-  
528 ysis, and writing of the paper.

529 Neil Davey, Rod Adams, Michael Schmuker, and Volker Steuber helped with formulating the  
530 theory, the analysis, and writing of the paper.

531 We are grateful to Benjamin-Torben Nielsen for fruitful discussions and feedback on the work.

532 This work has made use of the [University of Hertfordshire's high-performance computing facil-](#)  
533 [ity](#).

534 We are also most grateful to the NEST development team, in particular to Sandra Diaz-Pier, for  
535 discussions and assistance with the modelling of structural plasticity in the NEST simulator.

## 536 References

- 537 [Ras82] Douglas D. Rasmuson. "Reorganization of raccoon somatosensory cortex following  
538 removal of the fifth digit". In: *Journal of Comparative Neurology* 205.4 (1982), pp. 313–326.  
539 DOI: [10.1002/cne.902050402](https://doi.org/10.1002/cne.902050402) (cit. on p. 2).
- 540 [WC84] J. T. Wall and C. G. Cusick. "Cutaneous responsiveness in primary somatosensory (SI)  
541 hindpaw cortex before and after partial hindpaw deafferentation in adult rats". In: *The  
542 journal of neuroscience* 4.6 (1984), pp. 1499–1515. DOI: [10.1523/jneurosci.04-06-  
543 01499.1984](https://doi.org/10.1523/jneurosci.04-06-01499.1984) (cit. on p. 2).
- 544 [LK89] Stuart A. Lipton and Stanley B. Kater. "Neurotransmitter regulation of neuronal out-  
545 growth, plasticity and survival". In: *Trends in neurosciences* 12.7 (1989), pp. 265–270. ISSN:  
546 0166-2236. DOI: [10.1016/0166-2236\(89\)90026-x](https://doi.org/10.1016/0166-2236(89)90026-x). URL: [http://www.sciencedirect.  
547 com/science/article/pii/016622368990026X](http://www.sciencedirect.com/science/article/pii/016622368990026X) (cit. on p. 15).
- 548 [All+91] T. Allard, S. A. Clark, W. M. Jenkins, and M. M. Merzenich. "Reorganization of so-  
549 matosensory area 3b representations in adult owl monkeys after digital syndactyly". In:  
550 *Journal of neurophysiology* 66.3 (1991), pp. 1048–1058. DOI: [10.1152/jn.1991.66.3.1048](https://doi.org/10.1152/jn.1991.66.3.1048)  
551 (cit. on p. 2).
- 552 [GLK91] P E Garraghty, E A LaChica, and J H Kaas. "Injury-induced reorganization of somatosen-  
553 sory cortex is accompanied by reductions in GABA staining." In: *Somatosensory & motor  
554 research* 8 (4 1991), pp. 347–354. ISSN: 0899-0220 (cit. on p. 13).
- 555 [HS91] S. J. Heinen and A. A. Skavenski. "Recovery of visual responses in foveal V1 neurons  
556 following bilateral foveal lesions in adult monkey". In: *Experimental Brain Research* 83.3  
557 (1991), pp. 670–674. DOI: [10.1007/bf00229845](https://doi.org/10.1007/bf00229845) (cit. on p. 2).
- 558 [Pon+91] Tim P. Pons, Preston E. Garraghty, Alexander K. Ommaya, Jon H. Kaas, Edward Taub,  
559 et al. "Massive cortical reorganization after sensory deafferentation in adult macaques".  
560 In: *Science* 252.5014 (1991), pp. 1857–1860. DOI: [10.1126/science.1843843](https://doi.org/10.1126/science.1843843) (cit. on p. 2).
- 561 [Raj+93] R. Rajan, D. R. F. Irvine, L. Z. Wise, and P. Heil. "Effect of unilateral partial cochlear  
562 lesions in adult cats on the representation of lesioned and unlesioned cochleas in pri-  
563 mary auditory cortex". In: *Journal of Comparative Neurology* 338.1 (1993), pp. 17–49. DOI:  
564 [10.1002/cne.903380104](https://doi.org/10.1002/cne.903380104) (cit. on p. 2).
- 565 [DG94] Corinna Darian-Smith and Charles D. Gilbert. "Axonal sprouting accompanies func-  
566 tional reorganization in adult cat striate cortex". In: *Nature* 368.6473 (1994), pp. 737–740  
567 (cit. on pp. 2, 7).
- 568 [DG95] C. Darian-Smith and C. D. Gilbert. "Topographic reorganization in the striate cortex  
569 of the adult cat and monkey is cortically mediated". In: *The journal of neuroscience* 15.3  
570 (1995), pp. 1631–1647. DOI: [10.1523/jneurosci.15-03-01631.1995](https://doi.org/10.1523/jneurosci.15-03-01631.1995) (cit. on p. 2).
- 571 [KL95] Stanley B. Kater and Stuart A. Lipton. "Neurotransmitter regulation of neuronal out-  
572 growth, plasticity and survival in the year 2001". In: *Trends in neurosciences* 18.2 (1995),  
573 pp. 71–72. DOI: [10.1016/0166-2236\(95\)80025-w](https://doi.org/10.1016/0166-2236(95)80025-w) (cit. on p. 15).
- 574 [Ros+95] Anne-Marie Rosier, Lut Arckens, Hilde Demeulemeester, G. A. Orban, Ulf T. Eysel, et  
575 al. "Effect of sensory deafferentation on immunoreactivity of GABAergic cells and on  
576 GABA receptors in the adult cat visual cortex". In: *Journal of Comparative Neurology* 359.3  
577 (1995), pp. 476–489. DOI: [10.1002/cne.903590309](https://doi.org/10.1002/cne.903590309) (cit. on pp. 2, 13).
- 578 [Sal+95] Paul Salin, Guo-Fang Tseng, Stuart Hoffman, Isabel Parada, and David A. Prince. "Ax-  
579 onal sprouting in layer V pyramidal neurons of chronically injured cerebral cortex". In:  
580 *Journal of Neuroscience* 15.12 (1995), pp. 8234–8245. URL: [http://www.jneurosci.org/  
581 content/15/12/8234/tab-article-info](http://www.jneurosci.org/content/15/12/8234/tab-article-info) (cit. on p. 2).
- 582 [Per+96] Yaël Perez, France Morin, Clermont Beaulieu, and Jean-Claude Lacaille. "Axonal Sprout-  
583 ing of CA1 Pyramidal Cells in Hyperexcitable Hippocampal Slices of Kainate-treated  
584 Rats". In: *European Journal of Neuroscience* 8.4 (1996), pp. 736–748. DOI: [10.1111/j.1460-  
585 9568.1996.tb01259.x](https://doi.org/10.1111/j.1460-9568.1996.tb01259.x) (cit. on p. 13).
- 586 [FTK98] Sherre L. Florence, Hilary B. Taub, and Jon H. Kaas. "Large-scale sprouting of cortical  
587 connections after peripheral injury in adult macaque monkeys". In: *Science* 282.5391  
588 (1998), pp. 1117–1121. DOI: [10.1126/science.282.5391.1117](https://doi.org/10.1126/science.282.5391.1117) (cit. on p. 2).
- 589 [FH00] Michela Fagiolini and Takao K. Hensch. "Inhibitory threshold for critical-period activa-  
590 tion in primary visual cortex". In: *Nature* 404.6774 (2000), pp. 183–186. DOI: [10.1038/  
591 35004582](https://doi.org/10.1038/35004582) (cit. on p. 13).
- 592 [YMH00] Rafael Yuste, Ania Majewska, and Knut Holthoff. "From form to function: calcium com-  
593 partmentalization in dendritic spines". In: *Nature neuroscience* 3.7 (2000), p. 653. DOI:  
594 [10.1038/76609](https://doi.org/10.1038/76609) (cit. on p. 14).

- 595 [Kno+02] Graham W. Knott, Charles Quairiaux, Christel Genoud, and Egbert Welker. “Formation  
596 of dendritic spines with GABAergic synapses induced by whisker stimulation in adult  
597 mice”. In: *Neuron* 34.2 (2002), pp. 265–273. DOI: [10.1016/s0896-6273\(02\)00663-3](https://doi.org/10.1016/s0896-6273(02)00663-3)  
598 (cit. on pp. 2, 13).
- 599 [Tra+02] Joshua T. Trachtenberg, Brian E. Chen, Graham W. Knott, Guoping Feng, Joshua R.  
600 Sanes, et al. “Long-term in vivo imaging of experience-dependent synaptic plasticity  
601 in adult cortex”. In: *Nature* 420.6917 (2002), pp. 788–794. DOI: [10.1038/nature01273](https://doi.org/10.1038/nature01273)  
602 (cit. on pp. 2, 13, 19).
- 603 [KSS03] Kukjin Kang, Michael Shelley, and Haim Sompolinsky. “Mexican hats and pinwheels  
604 in visual cortex.” In: *Proceedings of the National Academy of Sciences of the United States*  
605 *of America* 100 (5 Mar. 2003), pp. 2848–2853. ISSN: 0027-8424. DOI: [10.1073/pnas.0138051100](https://doi.org/10.1073/pnas.0138051100) (cit. on p. 19).
- 607 [Mas+03] Ann Massie, Lieselotte Cnops, Ilse Smolders, Katrien Van Damme, Erik Vandenbuss-  
608 che, et al. “Extracellular GABA concentrations in area 17 of cat visual cortex during to-  
609 pographic map reorganization following binocular central retinal lesioning.” In: *Brain*  
610 *research* 976 (1 June 2003), pp. 100–108. ISSN: 0006-8993 (cit. on p. 13).
- 611 [Izh04] Eugene M. Izhikevich. “Which model to use for cortical spiking neurons?” In: *IEEE*  
612 *transactions on neural networks* 15.5 (2004), pp. 1063–1070 (cit. on p. 14).
- 613 [MBG04] Hamish Meffin, Anthony N. Burkitt, and David B. Grayden. “An analytical model  
614 for the ‘large, fluctuating synaptic conductance state’ typical of neocortical neurons in  
615 vivo”. In: *Journal of computational neuroscience* 16.2 (2004), pp. 159–175. URL: <https://link.springer.com/article/10.1023/B:JCNS.0000014108.03012.81> (cit. on  
616 pp. 2, 14, 15).
- 618 [Hen05] Takao K. Hensch. “Critical period plasticity in local cortical circuits”. In: *Nature Reviews*  
619 *Neuroscience* 6.11 (2005), p. 877. DOI: [10.1038/nrn1787](https://doi.org/10.1038/nrn1787) (cit. on p. 13).
- 620 [HS05] Peter W. Hickmott and Patricia A. Steen. “Large-scale changes in dendritic structure  
621 during reorganization of adult somatosensory cortex”. In: *Nature neuroscience* 8.2 (2005),  
622 pp. 140–142. DOI: [10.1038/nn1384](https://doi.org/10.1038/nn1384) (cit. on pp. 2, 13).
- 623 [Hol+05] Anthony J. G. D. Holtmaat, Joshua T. Trachtenberg, Linda Wilbrecht, Gordon M. Shep-  
624 herd, Xiaoqun Zhang, et al. “Transient and Persistent Dendritic Spines in the Neocor-  
625 tex In Vivo”. In: *Neuron* 45.2 (2005), pp. 279–291. ISSN: 0896-6273. DOI: [10.1016/j.neuron.2005.01.003](https://doi.org/10.1016/j.neuron.2005.01.003). URL: <http://www.sciencedirect.com/science/article/pii/S0896627305000048> (cit. on p. 2).
- 628 [Lee+05] Wei-Chung Allen Lee, Hayden Huang, Guoping Feng, Joshua R. Sanes, Emery N. Brown,  
629 et al. “Dynamic remodeling of dendritic arbors in GABAergic interneurons of adult visu-  
630 al cortex”. In: *PLoS biology* 4.2 (2005), e29. DOI: [10.1371/journal.pbio.0040029](https://doi.org/10.1371/journal.pbio.0040029) (cit.  
631 on p. 2).
- 632 [Ric+05] David A. Richards, José Maria Mateos, Sylvain Hugel, Vincenzo de Paola, Pico Caroni,  
633 et al. “Glutamate induces the rapid formation of spine head protrusions in hippocampal  
634 slice cultures”. In: *Proceedings of the National Academy of Sciences* 102.17 (2005), pp. 6166–  
635 6171. DOI: [10.1073/pnas.0501881102](https://doi.org/10.1073/pnas.0501881102) (cit. on p. 13).
- 636 [De +06] Vincenzo De Paola, Anthony Holtmaat, Graham Knott, Sen Song, Linda Wilbrecht, et al.  
637 “Cell Type-Specific Structural Plasticity of Axonal Branches and Boutons in the Adult  
638 Neocortex”. In: *Neuron* 49.6 (2006), pp. 861–875. ISSN: 0896-6273. DOI: [10.1016/j.neuron.2006.02.017](https://doi.org/10.1016/j.neuron.2006.02.017). URL: <http://www.sciencedirect.com/science/article/pii/S0896627306001346> (cit. on p. 2).
- 641 [Kno+06] Graham W. Knott, Anthony Holtmaat, Linda Wilbrecht, Egbert Welker, and Karel Svo-  
642 boda. “Spine growth precedes synapse formation in the adult neocortex in vivo”. In:  
643 *Nature neuroscience* 9.9 (2006), pp. 1117–1124. DOI: [10.1038/nn1747](https://doi.org/10.1038/nn1747) (cit. on p. 19).
- 644 [MNS06] Ania K. Majewska, Jessica R. Newton, and Mriganka Sur. “Remodeling of synaptic  
645 structure in sensory cortical areas in vivo”. In: *Journal of Neuroscience* 26.11 (2006), pp. 3021–  
646 3029. DOI: [10.1523/jneurosci.4454-05.2006](https://doi.org/10.1523/jneurosci.4454-05.2006) (cit. on p. 2).
- 647 [Ste+06] Dan D. Stettler, Homare Yamahachi, Wu Li, Winfried Denk, and Charles D. Gilbert.  
648 “Axons and Synaptic Boutons Are Highly Dynamic in Adult Visual Cortex”. In: *Neuron*  
649 49.6 (2006), pp. 877–887. ISSN: 0896-6273. DOI: [10.1016/j.neuron.2006.02.018](https://doi.org/10.1016/j.neuron.2006.02.018). URL:  
650 <http://www.sciencedirect.com/science/article/pii/S0896627306001358> (cit. on  
651 p. 2).
- 652 [GGC07] Nadine Gogolla, Ivan Galimberti, and Pico Caroni. “Structural plasticity of axon ter-  
653 minals in the adult”. In: *Current opinion in neurobiology* 17.5 (2007), pp. 516–524. DOI:  
654 [10.1016/j.conb.2007.09.002](https://doi.org/10.1016/j.conb.2007.09.002) (cit. on p. 2).

- 655 [Epp+08] Jochen Martin Eppler, Moritz Helias, Eilif Muller, Markus Diesmann, and Marc-Oliver  
656 Gewaltig. "PyNEST: a convenient interface to the NEST simulator". In: *Frontiers in neu-*  
657 *roinformatics* 2 (2008). DOI: [10.3389/conf.neuro.11.2008.01.083](https://doi.org/10.3389/conf.neuro.11.2008.01.083) (cit. on p. 14).
- 658 [Kec+08] Tara Keck, Thomas D. Mrsic-Flogel, Miguel Vaz Afonso, Ulf T. Eysel, Tobias Bonhoeffer,  
659 et al. "Massive restructuring of neuronal circuits during functional reorganization of  
660 adult visual cortex". In: *Nature neuroscience* 11.10 (2008), pp. 1162–1167. DOI: [10.1038/  
661 nn.2181](https://doi.org/10.1038/nn.2181) (cit. on pp. 2, 6, 7, 13).
- 662 [OL08] Michael Okun and Ilan Lampl. "Instantaneous correlation of excitation and inhibi-  
663 tion during ongoing and sensory-evoked activities". In: *Nature neuroscience* 11.5 (2008),  
664 p. 535. DOI: [10.1038/nn.2105](https://doi.org/10.1038/nn.2105) (cit. on p. 10).
- 665 [Tur08] Gina G. Turrigiano. "The self-tuning neuron: synaptic scaling of excitatory synapses".  
666 In: *Cell* 135.3 (2008), pp. 422–435. DOI: [10.1016/j.cell.2008.10.008](https://doi.org/10.1016/j.cell.2008.10.008) (cit. on p. 14).
- 667 [Vet+08] José Fernando Maya Vetencourt, Alessandro Sale, Alessandro Viegi, Laura Baroncelli,  
668 Roberto De Pasquale, et al. "The antidepressant fluoxetine restores plasticity in the  
669 adult visual cortex". In: *Science* 320.5874 (2008), pp. 385–388. DOI: [10.1126/science.  
670 1150516](https://doi.org/10.1126/science.1150516) (cit. on p. 13).
- 671 [BVW09] Markus Butz, Arjen Van Ooyen, and Florentin Wörgötter. "A model for cortical rewiring  
672 following deafferentation and focal stroke". In: *Frontiers in Computational Neuroscience* 3  
673 (2009). DOI: [10.3389/neuro.10.010.2009](https://doi.org/10.3389/neuro.10.010.2009) (cit. on p. 2).
- 674 [LV09] Laura Anne Lowery and David Van Vactor. "The trip of the tip: understanding the  
675 growth cone machinery". In: *Nature reviews Molecular cell biology* 10.5 (2009), p. 332. DOI:  
676 [10.1038/nrm2679](https://doi.org/10.1038/nrm2679) (cit. on p. 13).
- 677 [OL09] M. Okun and I. Lampl. "Balance of excitation and inhibition". In: *Scholarpedia* 4.8 (2009).  
678 revision #149451, p. 7467. DOI: [10.4249/scholarpedia.7467](https://doi.org/10.4249/scholarpedia.7467) (cit. on p. 10).
- 679 [Ste+09] Armen Stepanyants, Luis M Martinez, Alex S Ferecskó, and Zoltán F Kisvárday. "The  
680 fractions of short-and long-range connections in the visual cortex". In: *Proceedings of the  
681 National Academy of Sciences* 106.9 (2009), pp. 3555–3560 (cit. on p. 19).
- 682 [Yam+09] Homare Yamahachi, Sally A. Marik, Justin N. J. McManus, Winfried Denk, and Charles  
683 D. Gilbert. "Rapid axonal sprouting and pruning accompany functional reorganization  
684 in primary visual cortex". In: *Neuron* 64.5 (2009), pp. 719–729. DOI: [10.1016/j.neuron.  
685 2009.11.026](https://doi.org/10.1016/j.neuron.2009.11.026) (cit. on pp. 2, 7, 13).
- 686 [Mar+10] Sally A. Marik, Homare Yamahachi, Justin N. J. McManus, Gabor Szabo, and Charles  
687 D. Gilbert. "Axonal dynamics of excitatory and inhibitory neurons in somatosensory  
688 cortex". In: *PLoS Biology* 8.6 (2010), e1000395. DOI: [10.1371/journal.pbio.1000395](https://doi.org/10.1371/journal.pbio.1000395)  
689 (cit. on pp. 2, 7, 10, 13).
- 690 [Che+11] Jerry L. Chen, Walter C. Lin, Jae Won Cha, Peter T. So, Yoshiyuki Kubota, et al. "Struc-  
691 tural basis for the role of inhibition in facilitating adult brain plasticity". In: *Nature neu-*  
692 *roscience* 14.5 (2011), pp. 587–594 (cit. on pp. 2, 13).
- 693 [IS11] Jeffry S. Isaacson and Massimo Scanziani. "How inhibition shapes cortical activity". In:  
694 *Neuron* 72.2 (2011), pp. 231–243. DOI: [10.1016/j.neuron.2011.09.027](https://doi.org/10.1016/j.neuron.2011.09.027) (cit. on p. 10).
- 695 [Kec+11] Tara Keck, Volker Scheuss, R. Irene Jacobsen, Corette J. Wierenga, Ulf T. Eysel, et al.  
696 "Loss of sensory input causes rapid structural changes of inhibitory neurons in adult  
697 mouse visual cortex". In: *Neuron* 71.5 (2011), pp. 869–882. ISSN: 0896-6273. DOI: [10.  
698 1016/j.neuron.2011.06.034](https://doi.org/10.1016/j.neuron.2011.06.034). URL: [http://www.sciencedirect.com/science/  
699 article/pii/S0896627311005642](http://www.sciencedirect.com/science/article/pii/S0896627311005642) (cit. on pp. 2, 13).
- 700 [Liu+11] Bao-hua Liu, Ya-tang Li, Wen-pei Ma, Chen-jie Pan, Li I Zhang, et al. "Broad inhibition  
701 sharpens orientation selectivity by expanding input dynamic range in mouse simple  
702 cells". In: *Neuron* 71.3 (2011), pp. 542–554. DOI: [10.1016/j.neuron.2011.06.017](https://doi.org/10.1016/j.neuron.2011.06.017) (cit.  
703 on p. 19).
- 704 [May11] Arne May. "Experience-dependent structural plasticity in the adult human brain". In:  
705 *Trends in cognitive sciences* 15.10 (2011), pp. 475–482. DOI: [10.1016/j.tics.2011.08.002](https://doi.org/10.1016/j.tics.2011.08.002)  
706 (cit. on p. 2).
- 707 [Vog+11] T. P. Vogels, Henning Sprekeler, Friedemann Zenke, Claudia Clopath, and Wulfram  
708 Gerstner. "Inhibitory plasticity balances excitation and inhibition in sensory pathways  
709 and memory networks". In: *Science* 334.6062 (2011), pp. 1569–1573. URL: [http://www.  
710 sciencemag.org/content/334/6062/1569.short](http://www.sciencemag.org/content/334/6062/1569.short) (cit. on pp. 2, 3, 6, 17, 19).
- 711 [Che+12] Jerry L. Chen, Katherine L. Villa, Jae Won Cha, Peter T. C. So, Yoshiyuki Kubota, et al.  
712 "Clustered dynamics of inhibitory synapses and dendritic spines in the adult neocor-  
713 tex". In: *Neuron* 74.2 (2012), pp. 361–373. DOI: [10.1016/j.neuron.2012.02.030](https://doi.org/10.1016/j.neuron.2012.02.030) (cit. on  
714 pp. 2, 6, 13).

- 715 [Deg+12] Moritz Deger, Moritz Helias, Stefan Rotter, and Markus Diesmann. “Spike-timing de-  
716 pendence of structural plasticity explains cooperative synapse formation in the neocor-  
717 tex”. In: *PLoS computational biology* 8.9 (2012), e1002689. DOI: [10.1371/journal.pcbi.  
718 1002689](https://doi.org/10.1371/journal.pcbi.1002689) (cit. on p. 2).
- 719 [Dju12] Mikael Djurfeldt. “The connection-set algebra—a novel formalism for the representa-  
720 tion of connectivity structure in neuronal network models”. In: *Neuroinformatics* 10.3  
721 (2012), pp. 287–304. DOI: [10.1007/s12021-012-9146-1](https://doi.org/10.1007/s12021-012-9146-1) (cit. on p. 14).
- 722 [Ver+12] Daniëlle van Versendaal, Rajeev Rajendran, M. Hadi Saiepour, Jan Klooster, Laura Smit-  
723 Rigter, et al. “Elimination of inhibitory synapses is a major component of adult ocular  
724 dominance plasticity”. In: *Neuron* 74.2 (2012), pp. 374–383. DOI: [10.1016/j.neuron.  
725 2012.03.015](https://doi.org/10.1016/j.neuron.2012.03.015) (cit. on p. 13).
- 726 [BO13] Markus Butz and Arjen van Ooyen. “A Simple Rule for Dendritic Spine and Axonal  
727 Bouton Formation Can Account for Cortical Reorganization after Focal Retinal Lesions”.  
728 In: *PLoS Comput Biol* 9.10 (2013), e1003259. DOI: [10.1371/journal.pcbi.1003259](https://doi.org/10.1371/journal.pcbi.1003259) (cit.  
729 on pp. 2, 13, 14).
- 730 [Goo13] G. J. Goodhill. “Axonal growth and guidance”. In: *Scholarpedia* 8.10 (2013). revision  
731 #143360, p. 1663. DOI: [10.4249/scholarpedia.1663](https://doi.org/10.4249/scholarpedia.1663) (cit. on p. 13).
- 732 [HHC13] Bilal Haider, Michael Häusser, and Matteo Carandini. “Inhibition dominates sensory  
733 responses in the awake cortex”. In: *Nature* 493.7430 (2013), p. 97 (cit. on p. 19).
- 734 [Kec+13] Tara Keck, Georg B. Keller, R. Irene Jacobsen, Ulf T. Eysel, Tobias Bonhoeffer, et al.  
735 “Synaptic scaling and homeostatic plasticity in the mouse visual cortex in vivo”. In:  
736 *Neuron* 80.2 (2013), pp. 327–334. DOI: [10.1016/j.neuron.2013.08.018](https://doi.org/10.1016/j.neuron.2013.08.018) (cit. on p. 14).
- 737 [Rud+13] Philipp Rudiger, Judith S. Law, Jan Antolik, and James Bednar. “Developing orientation  
738 maps using realistic patterns of lateral connectivity”. In: *BMC Neuroscience* 14.1 (July  
739 2013), P21. ISSN: 1471-2202. DOI: [10.1186/1471-2202-14-S1-P21](https://doi.org/10.1186/1471-2202-14-S1-P21). URL: [https://doi.  
740 org/10.1186/1471-2202-14-S1-P21](https://doi.org/10.1186/1471-2202-14-S1-P21) (cit. on p. 19).
- 741 [Sch+13] Anne Schuemann, Agnieszka Klawiter, Tobias Bonhoeffer, and Corette J. Wierenga.  
742 “Structural plasticity of GABAergic axons is regulated by network activity and GABAA  
743 receptor activation”. In: *Frontiers in neural circuits* 7 (2013), p. 113. DOI: [10.3389/fncir.  
744 2013.00113](https://doi.org/10.3389/fncir.2013.00113) (cit. on p. 13).
- 745 [BO14] Markus Butz and Arjen van Ooyen. “Homeostatic structural plasticity—a key to neu-  
746 ronal network formation and repair”. In: *BMC Neuroscience* 15.Suppl 1 (2014), P17. DOI:  
747 [10.1186/1471-2202-15-s1-p17](https://doi.org/10.1186/1471-2202-15-s1-p17) (cit. on p. 2).
- 748 [BSO14a] Markus Butz, Ines D. Steenbuck, and Arjen van Ooyen. “Homeostatic structural plas-  
749 ticity can account for topology changes following deafferentation and focal stroke”. In:  
750 *Frontiers in Neuroanatomy* 8 (2014), p. 115. DOI: [10.3389/fnana.2014.00115](https://doi.org/10.3389/fnana.2014.00115) (cit. on  
751 p. 2).
- 752 [BSO14b] Markus Butz, Ines D. Steenbuck, and Arjen van Ooyen. “Homeostatic structural plastic-  
753 ity increases the efficiency of small-world networks”. In: *Frontiers in synaptic neuroscience*  
754 6 (2014). DOI: [10.3389/fnsyn.2014.00007](https://doi.org/10.3389/fnsyn.2014.00007) (cit. on p. 2).
- 755 [Mar+14] Sally A. Marik, Homare Yamahachi, Stephan Meyer zum Alten Borgloh, and Charles  
756 D. Gilbert. “Large-scale axonal reorganization of inhibitory neurons following retinal  
757 lesions”. In: *Journal of Neuroscience* 34.5 (2014), pp. 1625–1632. DOI: [10.1523/jneurosci.  
758 4345-13.2014](https://doi.org/10.1523/jneurosci.4345-13.2014) (cit. on pp. 2, 10, 13).
- 759 [SK15] Rosanna P. Sammons and Tara Keck. “Adult plasticity and cortical reorganization after  
760 peripheral lesions”. In: *Current Opinion in Neurobiology* 35 (2015). Circuit plasticity and  
761 memory, pp. 136–141. ISSN: 0959-4388. DOI: [10.1016/j.conb.2015.08.004](https://doi.org/10.1016/j.conb.2015.08.004). URL:  
762 <http://www.sciencedirect.com/science/article/pii/S0959438815001312> (cit. on  
763 p. 2).
- 764 [Sin+15] Ankur Sinha, Neil Davey, Roderick Adams, and Volker Steuber. “Structural plasticity  
765 and associative memory in balanced neural networks with spike-time dependent in-  
766 hibitory plasticity”. In: *BMC Neuroscience* 16.1 (2015), p. 1. URL: [http://www.biomedcentral.  
767 com/1471-2202/16/S1/P235](http://www.biomedcentral.com/1471-2202/16/S1/P235) (cit. on p. 2).
- 768 [Dia+16] Sandra Diaz-Pier, Mikael Naveau, Markus Butz-Ostendorf, and Abigail Morrison. “Au-  
769 tomatic generation of connectivity for large-scale neuronal network models through  
770 structural plasticity”. In: *Frontiers in neuroanatomy* 10 (2016). DOI: [10.3389/fnana.2016.  
771 00057](https://doi.org/10.3389/fnana.2016.00057) (cit. on pp. 2, 14).



- 772 [Vil+16] Katherine L. Villa, Kalen P. Berry, Jaichandar Subramanian, Jae Won Cha, Won Chan  
773 Oh, et al. "Inhibitory Synapses Are Repeatedly Assembled and Removed at Persistent  
774 Sites In Vivo." In: *Neuron* 89 (4 Feb. 2016), pp. 756–769. ISSN: 1097-4199. DOI: [10.1016/  
775 j.neuron.2016.01.010](https://doi.org/10.1016/j.neuron.2016.01.010) (cit. on p. 2).
- 776 [Gle+17] Padraig Gleeson, Andrew P. Davison, R. Angus Silver, and Giorgio A. Ascoli. "A Com-  
777 mitment to Open Source in Neuroscience". In: *Neuron* 96.5 (2017), pp. 964–965. DOI:  
778 [10.1016/j.neuron.2017.10.013](https://doi.org/10.1016/j.neuron.2017.10.013) (cit. on p. 14).
- 779 [OB17] Arjen van Ooyen and Markus Butz. *The rewiring brain*. Academic Press, June 2017. ISBN:  
780 9780128038727. URL: [https://www.elsevier.com/books/the-rewiring-brain/van-  
781 ooyen/978-0-12-803784-3](https://www.elsevier.com/books/the-rewiring-brain/van-ooyen/978-0-12-803784-3) (cit. on p. 2).
- 782 [Pey+17] Alexander Peyser, Ankur Sinha, Stine Brekke Vennemo, Tammo Ippen, Jakob Jordan,  
783 et al. *NEST 2.14.0*. Oct. 2017. DOI: [10.5281/zenodo.882971](https://doi.org/10.5281/zenodo.882971) (cit. on p. 14).
- 784 [GR18] Júlia V. Gallinaro and Stefan Rotter. "Associative properties of structural plasticity based  
785 on firing rate homeostasis in recurrent neuronal networks". In: *Scientific reports* 8.1  
786 (2018), p. 3754. DOI: [10.1038/s41598-018-22077-3](https://doi.org/10.1038/s41598-018-22077-3) (cit. on p. 2).
- 787 [Jor+18] Jakob Jordan, Tammo Ippen, Moritz Helias, Itaru Kitayama, Mitsuhsa Sato, et al. "Ex-  
788 tremely scalable spiking neuronal network simulation code: from laptops to exascale  
789 computers". In: *Frontiers in neuroinformatics* 12 (2018), p. 2. DOI: [10.3389/fninf.2018.  
790 00002](https://doi.org/10.3389/fninf.2018.00002) (cit. on p. 14).
- 791 [LGR18] Han Lu, Júlia V. Gallinaro, and Stefan Rotter. "Network remodeling induced by tran-  
792 scranial brain stimulation: A computational model of tDCS-triggered cell assembly for-  
793 mation". In: *Network Neuroscience* (2018), pp. 1–21. DOI: [10.1101/466136](https://doi.org/10.1101/466136) (cit. on p. 2).
- 794 [Now+18] Christian Nowke, Sandra Diaz-Pier, Benjamin Weyers, Bernd Hentschel, Abigail Mor-  
795 rison, et al. "Toward Rigorous Parameterization of Underconstrained Neural Network  
796 Models Through Interactive Visualization and Steering of Connectivity Generation". In:  
797 *Frontiers in Neuroinformatics* 12 (2018), p. 32. ISSN: 1662-5196. DOI: [10.3389/fninf.2018.  
798 00032](https://doi.org/10.3389/fninf.2018.00032). URL: <https://www.frontiersin.org/article/10.3389/fninf.2018.00032>  
799 (cit. on p. 14).
- 800 [Jor+19] Jakob Jordan, Håkon Mørk, Stine Brekke Vennemo, Dennis Terhorst, Alexander Peyser,  
801 et al. *NEST 2.18.0*. June 2019. DOI: [10.5281/zenodo.2605422](https://doi.org/10.5281/zenodo.2605422). URL: [https://doi.org/  
802 10.5281/zenodo.2605422](https://doi.org/10.5281/zenodo.2605422) (cit. on p. 14).
